# Supplementary material for: Theoretical study on the mechanism of selective fluorination of aromatic compounds with Selectfluor
Source: Royal Society of Chemistry journal article supplement (doi:10.1039/c4ra15202f), 2015-01-01
Supplement: c4ra15202f1.pdf [file c4ra15202f1.pdf]

Supporting Information for

**Theoretical Study on Mechanism of Selective Fluorination of  
Aromatic Compounds with Selectfluor**

Cuihuan Geng,<sup>a</sup> Likai Du,<sup>b</sup> Fang Liu,<sup>a</sup> Rongxiu Zhu,<sup>a,\*</sup> Chengbu Liu,<sup>a,\*</sup>

<sup>a</sup>Institute of Theoretical Chemistry, School of Chemistry and Chemical Engineering, Shandong University  
Jinan, P. R. China

[rxzhu@sdu.edu.cn](mailto:rxzhu@sdu.edu.cn); [cbliu@sdu.edu.cn](mailto:cbliu@sdu.edu.cn)

<sup>b</sup>Key Laboratory of Bio-based Materials, Qingdao Institute of Bio-energy and Bioprocess Technology,  
Chinese Academy of Sciences, Qingdao, 266101 Shandong, P. R. China.

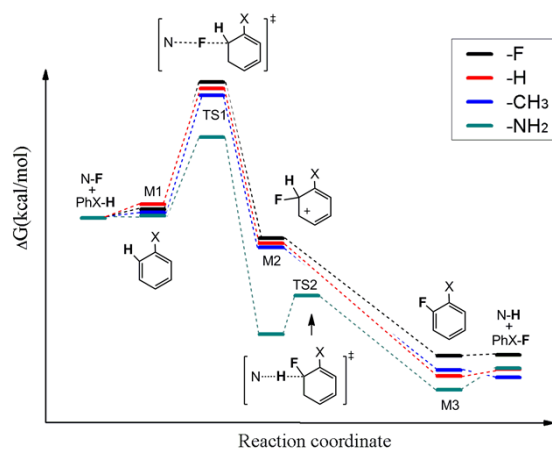

**Fig. S1** DFT computed energy surfaces for the fluorination of various aromatic compounds PhX (X= F, H, CH<sub>3</sub>, NH<sub>2</sub>) with Selectfluor of S<sub>N</sub>2 mechanism.

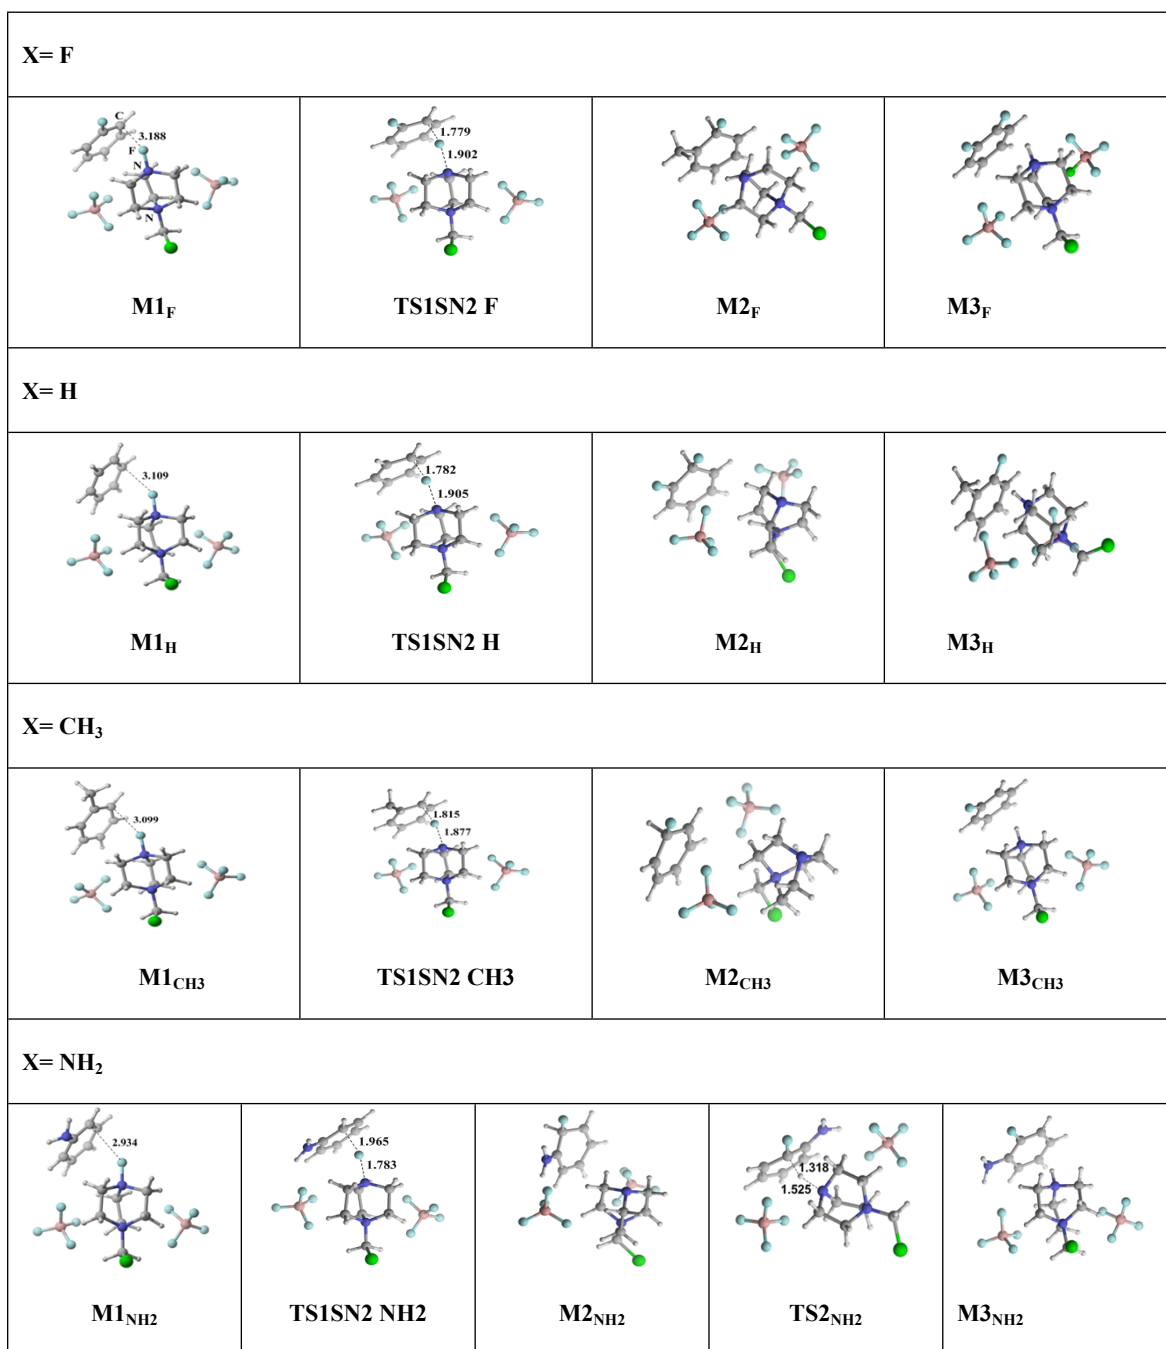

**Fig. S2** The optimized structure in the S<sub>N</sub>2 mechanism of PhX/Selectfluor (X= F, H, CH<sub>3</sub>, NH<sub>2</sub>).

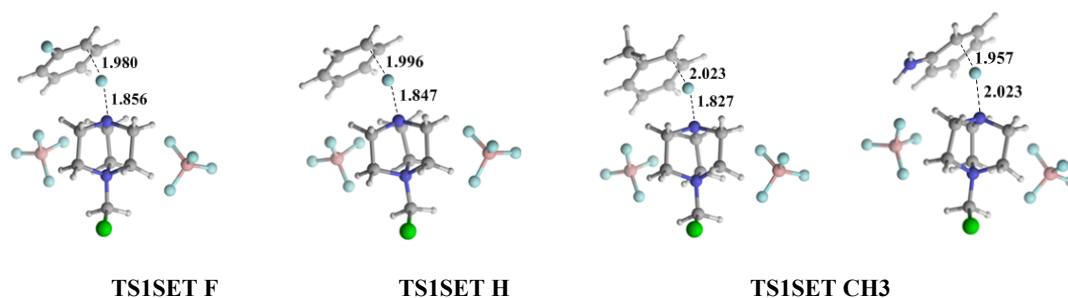

TS1SET NH2

**Fig. S3** The optimized structures of transition state in the fluorine transfer mechanism (SET) of PhX/Selectfluor (X= F, H, CH<sub>3</sub>, NH<sub>2</sub>).

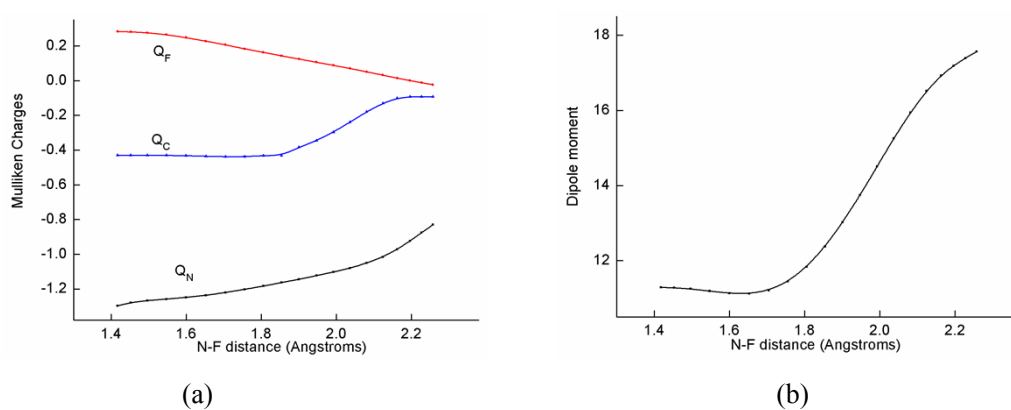

**Fig. S4.** The evolution of charge distribution as well as the dipole moment along the fluorine transfer process. The PhNH<sub>2</sub> molecule is selected as a typical model.

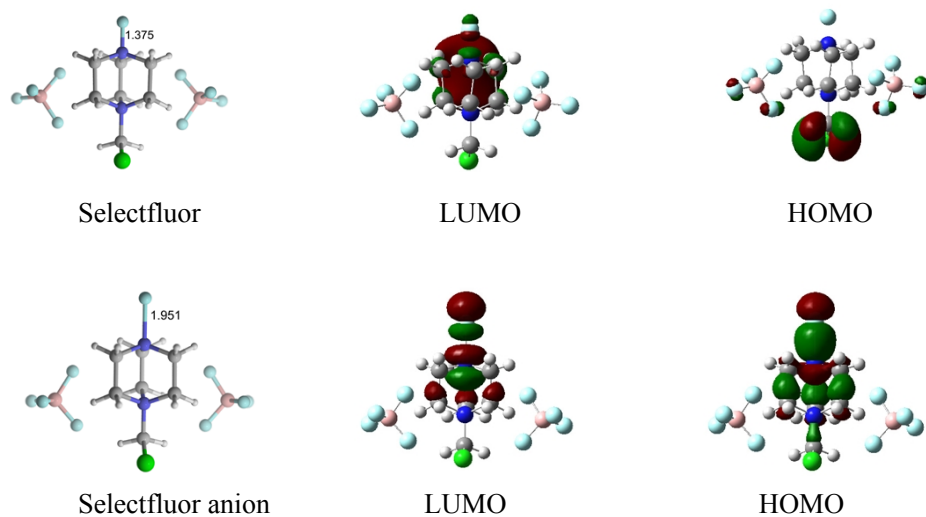

**Fig. S5** The optimized structure of Selectfluor and its radical anion, the related HOMO and LUMO orbitals are also given.

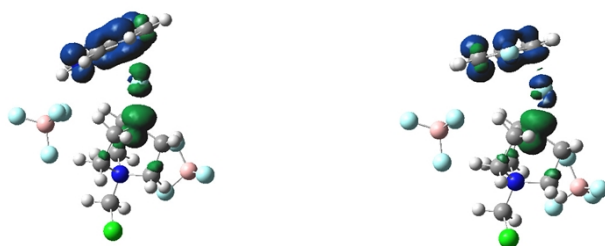

**Fig. S6.** Spin density distribution of  $\pi$  complexes at the transition state of SET mechanism, for PhNH<sub>2</sub> (left) and PhF (right) complexed with Selectfluor.

**Table S1** The bond distances (X-ray experimental values in parentheses, MP2/cc-pVDZ structures, M06-2X/6-311++g\*\* structures) of Selectfluor (a), radical anion (b). Bond distances in Å.

(a)

|                                  | X-ray experimental values<br>in parentheses | MP2/cc-pVDZ | M06-2X/6-311++g** |
|----------------------------------|---------------------------------------------|-------------|-------------------|
| N1-F                             | 1.37                                        | 1.390       | 1.375             |
| N1-CH <sub>2</sub>               | 1.48                                        | 1.498       | 1.498             |
| CH <sub>2</sub> -CH <sub>2</sub> | 1.50                                        | 1.546       | 1.541             |
| N1-N2                            | -                                           | 2.508       | 2.488             |
| N2-CH <sub>2</sub>               | 1.50                                        | 1.518       | 1.503             |
| N2-CH <sub>2</sub> Cl            | 1.53                                        | 1.535       | 1.506             |
| CH <sub>2</sub> -Cl              | -                                           | 1.747       | 1.766             |

(b)

|                                  | MP2/cc-pVDZ | M06-2X/6-311++g** |
|----------------------------------|-------------|-------------------|
| N1-F                             | 1.968       | 1.951             |
| N1-CH <sub>2</sub>               | 1.458       | 1.453             |
| CH <sub>2</sub> -CH <sub>2</sub> | 1.552       | 1.477             |
| N1-N2                            | 2.522       | 2.488             |
| N2-CH <sub>2</sub>               | 1.521       | 1.509             |
| N2-CH <sub>2</sub> Cl            | 1.509       | 1.493             |
| CH <sub>2</sub> -Cl              | 1.758       | 1.781             |

**Table S2** The second-order perturbation stabilization energy (E(2), kcal/mol) due to the  $\pi \rightarrow \sigma^*$  (N1-F) and  $\pi \rightarrow \sigma^*$  (C-H) in the complexes at the M06-2X/6-311++G\*\* level.

|                | -F   | -H   | -CH3 | -NH2 |
|----------------|------|------|------|------|
| E(2) F/ $\pi$  | 0.08 | 0.47 | 0.52 | 1.21 |
| E(2) H1/ $\pi$ | 0.23 | 1.75 | 3.00 | 2.13 |
| E(2) H2/ $\pi$ | 1.25 | 2.48 | 1.86 | 1.74 |

**Table S3** The orbital energies on LUMO and HOMO of Seleclfluor and substituted benzene, and their different energy gaps between Seleclfluor and substituted benzene (energies in eV, isovalue = 0.02)

|      | LUMO  | HOMO   | HOMO $\rightarrow$ LUMO |
|------|-------|--------|-------------------------|
| N-F  | -1.39 | -11.79 |                         |
| -F   | -0.05 | -8.43  | 8.38                    |
| -H   | 0.00  | -8.42  | 8.42                    |
| -CH3 | -0.03 | -8.06  | 8.03                    |
| -NH2 | -0.13 | -6.88  | 6.75                    |

**Table S4** Relative Gibbs free energies ( $\Delta G$ , kcal/mol) for the fluorination of aromatic compounds with Selectfluor in the gas phase ( $\Delta G_{\text{rel gas}}$ ) and acetonitrile solvent ( $\Delta G_{\text{rel sol}}$ ) condition.

|                          |                              | $\Delta G_{\text{rel gas}}$ | $\Delta G_{\text{rel sol}}$ |
|--------------------------|------------------------------|-----------------------------|-----------------------------|
| <b>X= F</b>              | <b>PhXH + N-F</b>            | 0.0                         | 0.0                         |
|                          | <b>M1<sub>F</sub></b>        | 2.85                        | 13.43                       |
|                          | <b>TS1S<sub>N</sub>2 F</b>   | 44.13                       | 48.51                       |
|                          | <b>TS1SET F</b>              | 38.31                       | 44.20                       |
|                          | <b>M2<sub>F</sub></b>        | -5.20                       | 2.18                        |
|                          | <b>M3<sub>F</sub></b>        | -45.75                      | -43.66                      |
| <b>X= H</b>              | <b>PhXH + N-F</b>            | 0.0                         | 0.0                         |
|                          | <b>M1<sub>H</sub></b>        | 3.50                        | 6.80                        |
|                          | <b>TS1S<sub>N</sub>2 H</b>   | 43.77                       | 47.50                       |
|                          | <b>TS1SET H</b>              | 38.46                       | 43.01                       |
|                          | <b>M2<sub>H</sub></b>        | -8.38                       | -0.76                       |
|                          | <b>M3<sub>H</sub></b>        | -52.58                      | -51.27                      |
| <b>X= CH<sub>3</sub></b> | <b>PhXH + N-F</b>            | 0.0                         | 0.0                         |
|                          | <b>M1<sub>CH3</sub></b>      | 2.73                        | 6.40                        |
|                          | <b>TS1S<sub>N</sub>2 CH3</b> | 40.69                       | 44.29                       |
|                          | <b>TS1SET CH3</b>            | 35.67                       | 40.73                       |
|                          | <b>M2<sub>CH3</sub></b>      | -8.84                       | -2.46                       |
|                          | <b>M3<sub>CH3</sub></b>      | -50.63                      | -48.68                      |
| <b>X= NH<sub>2</sub></b> | <b>PhXH + N-F</b>            | 0.0                         | 0.0                         |
|                          | <b>M1<sub>NH2</sub></b>      | 0.81                        | 5.67                        |
|                          | <b>TS1S<sub>N</sub>2 NH2</b> | 26.86                       | 32.58                       |
|                          | <b>TS1SET NH2</b>            | 17.89                       | 23.15                       |
|                          | <b>M2<sub>NH2</sub></b>      | -38.62                      | -27.89                      |
|                          | <b>TS2<sub>NH2</sub></b>     | -25.79                      | -20.08                      |
|                          | <b>M3<sub>NH2</sub></b>      | -57.14                      | -52.19                      |



**Table S5** The critical geometric parameters as well as Mulliken charge of the transition state in S<sub>N</sub>2 and SET mechanism.

| Complex                | d(N1-F)          |       | d(C-F)           |       | Charge           |       |
|------------------------|------------------|-------|------------------|-------|------------------|-------|
|                        | S <sub>N</sub> 2 | SET   | S <sub>N</sub> 2 | SET   | S <sub>N</sub> 2 | SET   |
| N1-F/PhF               | 1.902            | 1.856 | 1.779            | 1.980 | 0.356            | 0.208 |
| N1-F/PhH               | 1.905            | 1.847 | 1.782            | 1.996 | 0.339            | 0.197 |
| N1-F/PhCH <sub>3</sub> | 1.877            | 1.827 | 1.815            | 2.023 | 0.379            | 0.237 |
| N1-F/PhNH <sub>2</sub> | 1.783            | 2.023 | 1.965            | 1.957 | 0.413            | 0.033 |

## Cartesian coordinates of the optimized structures

| <b>N-F</b>                           |             |             |             |
|--------------------------------------|-------------|-------------|-------------|
| <b>Num. Imaginary Frequencies: 0</b> |             |             |             |
| H                                    | 1.23978400  | -1.08706000 | 2.72357400  |
| C                                    | 1.24679300  | -0.97475300 | 1.64057400  |
| C                                    | 1.21003900  | 0.50058100  | 1.19551300  |
| H                                    | 2.09349200  | -1.49457300 | 1.19168700  |
| N                                    | -0.00058600 | -1.63514500 | 1.13732800  |
| H                                    | 2.09990100  | 0.75817900  | 0.63082500  |
| H                                    | 1.11336300  | 1.16687500  | 2.04969300  |
| N                                    | 0.00014600  | 0.71867400  | 0.32979500  |
| C                                    | -1.24795200 | -0.97419200 | 1.63990700  |
| C                                    | -0.00022400 | -1.69944500 | -0.35259400 |
| C                                    | -1.20984500 | 0.50132100  | 1.19558300  |
| C                                    | 0.00055500  | 2.09131300  | -0.29015200 |
| C                                    | -0.00011800 | -0.24422300 | -0.84862400 |
| H                                    | -1.24187400 | -1.08695900 | 2.72286300  |
| H                                    | -2.09467700 | -1.49324200 | 1.19018500  |
| H                                    | -0.90918400 | -2.21761400 | -0.64757600 |
| H                                    | 0.90884100  | -2.21766100 | -0.64714900 |
| H                                    | -2.09958100 | 0.75997600  | 0.63115500  |
| H                                    | -1.11236300 | 1.16713100  | 2.05005100  |
| Cl                                   | 0.00072500  | 3.36567000  | 0.93291200  |
| H                                    | 0.91155200  | 2.16480100  | -0.88310300 |
| H                                    | -0.91029100 | 2.16523600  | -0.88327800 |
| H                                    | -0.90721400 | -0.03664100 | -1.41472300 |
| H                                    | 0.90690100  | -0.03685000 | -1.41492900 |
| F                                    | -4.00520300 | -0.04276000 | 0.43332600  |
| F                                    | -2.75853900 | -1.35300300 | -0.94213700 |
| F                                    | -2.83686300 | 0.90074700  | -1.29781700 |
| F                                    | -4.70162800 | -0.39071000 | -1.74403000 |
| B                                    | -3.64070200 | -0.22308900 | -0.91480000 |
| F                                    | -0.00099100 | -2.92439700 | 1.61604900  |
| F                                    | 2.83681600  | 0.89973700  | -1.29857500 |
| F                                    | 4.00627300  | -0.04168100 | 0.43293000  |
| F                                    | 4.70114900  | -0.39245700 | -1.74447800 |
| F                                    | 2.75852300  | -1.35354400 | -0.93999700 |
| B                                    | 3.64085700  | -0.22365100 | -0.91466800 |

## PhF

| <b>Num. Imaginary Frequencies: 0</b> |             |             |             |
|--------------------------------------|-------------|-------------|-------------|
| C                                    | 1.13020000  | -1.20440900 | 0.00000200  |
| C                                    | 1.82723300  | -0.00000100 | 0.00000200  |
| C                                    | 1.13020700  | 1.20440500  | -0.00000100 |
| C                                    | -0.26078100 | 1.21356000  | -0.00000100 |
| C                                    | -0.92508100 | 0.00000400  | 0.00000100  |
| C                                    | -0.26078100 | -1.21355800 | 0.00000100  |
| H                                    | 1.66921000  | -2.14407500 | 0.00000400  |
| H                                    | 2.90992900  | -0.00000600 | 0.00000300  |
| H                                    | 1.66921200  | 2.14407300  | -0.00000200 |
| H                                    | -0.83093700 | 2.13380300  | -0.00000300 |
| H                                    | -0.83095100 | -2.13379300 | 0.00000100  |
| F                                    | -2.27027200 | -0.00000100 | -0.00000400 |

## M1F

| <b>Num. Imaginary Frequencies: 0</b> |             |             |             |
|--------------------------------------|-------------|-------------|-------------|
| H                                    | 0.05317900  | 0.38235100  | 3.13602400  |
| C                                    | 0.28938100  | 0.56795400  | 2.08878900  |
| C                                    | -0.60237800 | 1.64677500  | 1.44166300  |
| H                                    | 1.34373000  | 0.80933100  | 1.95316900  |
| N                                    | 0.04667600  | -0.71756200 | 1.36776600  |
| H                                    | -0.00740100 | 2.36448700  | 0.88286100  |
| H                                    | -1.20745500 | 2.15144500  | 2.19231600  |
| N                                    | -1.54591000 | 0.97882800  | 0.48013500  |
| C                                    | -1.34561900 | -1.22571300 | 1.57986200  |
| C                                    | 0.34185100  | -0.56518400 | -0.09172800 |
| C                                    | -2.30710900 | -0.07389900 | 1.24307400  |
| C                                    | -2.46390600 | 1.96680800  | -0.18375800 |
| C                                    | -0.76464000 | 0.33887000  | -0.65722900 |
| H                                    | -1.41615400 | -1.52445400 | 2.62444200  |
| H                                    | -1.48477000 | -2.07902700 | 0.91737700  |
| H                                    | 0.28762400  | -1.56036600 | -0.53101600 |
| H                                    | 1.33595900  | -0.12495100 | -0.18254900 |
| H                                    | -3.12869500 | -0.43509400 | 0.62886800  |
| H                                    | -2.69396200 | 0.40603800  | 2.14011500  |
| Cl                                   | -3.53317000 | 2.75593600  | 0.98205000  |
| H                                    | -1.83076600 | 2.71584700  | -0.65792900 |
| H                                    | -3.06733600 | 1.40085300  | -0.89276000 |
| H                                    | -1.48260500 | -0.23666500 | -1.23598200 |

|   |             |             |             |
|---|-------------|-------------|-------------|
| H | -0.32692800 | 1.14046400  | -1.24738300 |
| F | -3.60679600 | -2.49372200 | 0.18818800  |
| F | -1.78294100 | -2.38487200 | -1.17432700 |
| F | -3.47068800 | -0.85676300 | -1.40410900 |
| F | -3.81860100 | -3.04982500 | -2.04551200 |
| B | -3.20640900 | -2.24212600 | -1.14207400 |
| F | 0.90511900  | -1.64903800 | 1.89644000  |
| F | 0.40527000  | 3.22462500  | -0.94114100 |
| F | 1.97870300  | 2.04685400  | 0.22496400  |
| F | 2.65768200  | 3.54879500  | -1.38355300 |
| F | 1.61113400  | 1.58582800  | -1.98401100 |
| B | 1.70172100  | 2.63485500  | -1.05604800 |
| C | 3.13514300  | -2.27006700 | -1.38097900 |
| C | 3.43883100  | -0.97331700 | -1.78869900 |
| C | 3.85947600  | -0.03127600 | -0.85486300 |
| C | 3.96957000  | -0.37522900 | 0.48984100  |
| C | 3.65352500  | -1.66930400 | 0.86511500  |
| C | 3.23919300  | -2.63124200 | -0.04017800 |
| H | 3.33592900  | -0.68824300 | -2.82774500 |
| H | 4.29010900  | 0.34232600  | 1.23522700  |
| H | 3.00977100  | -3.63119000 | 0.30679400  |
| H | 2.80946100  | -3.00652300 | -2.10630600 |
| H | 4.07645200  | 0.98318300  | -1.16529600 |
| F | 3.73510900  | -2.00346800 | 2.17025700  |

|    |             |             |             |
|----|-------------|-------------|-------------|
| H  | 1.06866300  | -0.11170400 | -0.70608300 |
| H  | -3.14195500 | -0.45811600 | 0.88315200  |
| H  | -2.41825600 | 0.24671800  | 2.35554400  |
| Cl | -3.42505700 | 2.70015600  | 1.61434100  |
| H  | -2.09946800 | 2.80325100  | -0.33293000 |
| H  | -3.36501500 | 1.50628600  | -0.42183100 |
| H  | -1.85329200 | -0.00598200 | -1.28180400 |
| H  | -0.65247500 | 1.34075900  | -1.28722800 |
| F  | -3.84262000 | -2.40279400 | 0.26861300  |
| F  | -2.26573600 | -2.16005800 | -1.36169900 |
| F  | -3.90011700 | -0.57650700 | -1.11220900 |
| F  | -4.44213500 | -2.66062700 | -1.94731900 |
| B  | -3.64986100 | -1.98907600 | -1.06347900 |
| F  | 1.65471200  | -1.85379700 | 1.04161700  |
| F  | 0.58047900  | 3.13277000  | -1.16027900 |
| F  | 2.20355500  | 1.93627800  | -0.07819200 |
| F  | 2.79460100  | 3.30337400  | -1.82651700 |
| F  | 1.61145700  | 1.37257900  | -2.21221300 |
| B  | 1.81471700  | 2.47280200  | -1.34945800 |
| C  | 3.12069000  | -2.66883200 | -0.72627500 |
| C  | 3.31094800  | -1.60870000 | -1.56682500 |
| C  | 3.77294500  | -0.37338800 | -1.05196500 |
| C  | 4.12499600  | -0.21864200 | 0.29006800  |
| C  | 3.92971700  | -1.28794000 | 1.12210200  |
| C  | 3.27907700  | -2.48788500 | 0.69020100  |
| H  | 3.09924700  | -1.69097300 | -2.62489800 |
| H  | 4.49171700  | 0.72470700  | 0.67177700  |
| H  | 3.29946000  | -3.34223200 | 1.35491600  |
| H  | 2.74465400  | -3.61749200 | -1.08881100 |
| H  | 3.85602100  | 0.47994700  | -1.71595400 |
| F  | 4.19712400  | -1.18804900 | 2.41301100  |

**TS1S<sub>N</sub>2 F**

**Num. Imaginary Frequencies: 1**

|   |             |             |             |
|---|-------------|-------------|-------------|
| H | 0.37603700  | 0.13110700  | 2.82703200  |
| C | 0.46765900  | 0.38271500  | 1.77032500  |
| C | -0.46569600 | 1.55632300  | 1.37149600  |
| H | 1.49512700  | 0.64545500  | 1.52650300  |
| N | 0.07985800  | -0.78790400 | 0.99102600  |
| H | 0.04948400  | 2.27952700  | 0.73910200  |
| H | -0.89128400 | 2.04553100  | 2.24587000  |
| N | -1.60143000 | 0.97878300  | 0.56930200  |
| C | -1.20229900 | -1.33521900 | 1.41834300  |
| C | 0.09831400  | -0.52762200 | -0.43962300 |
| C | -2.21509100 | -0.15488700 | 1.36400000  |
| C | -2.62050900 | 2.00715600  | 0.19585500  |
| C | -1.03559000 | 0.47397700  | -0.75025100 |
| H | -1.11870700 | -1.71682800 | 2.43544400  |
| H | -1.50766300 | -2.12647600 | 0.73625200  |
| H | -0.09244900 | -1.46176900 | -0.96548000 |

**TS1SET F**

**Num. Imaginary Frequencies: 1**

|   |             |             |            |
|---|-------------|-------------|------------|
| H | 0.41073200  | 0.09050500  | 2.81189600 |
| C | 0.49344400  | 0.37148800  | 1.76255400 |
| C | -0.45723400 | 1.53655300  | 1.38348400 |
| H | 1.51810100  | 0.63635100  | 1.51061100 |
| N | 0.09435400  | -0.77719000 | 0.95555800 |
| H | 0.04736000  | 2.27521300  | 0.76143800 |
| H | -0.88495900 | 2.00502800  | 2.26788700 |
| N | -1.59074500 | 0.95753300  | 0.57646400 |
| C | -1.16838900 | -1.36677900 | 1.38291800 |



F -4.84959300 0.31446900 0.55214400

C 3.11940700 0.37714800 1.17540600

C 3.07899800 -1.00440200 1.05926600

H 3.59074300 -1.26612100 -2.25334600

H 3.33089400 2.26482200 0.20327000

H 3.17659500 -2.68647600 -0.24407100

H 3.68339400 1.20216300 -2.03230900

H 0.84932300 0.81486200 1.81285800

N -0.03474800 0.51257700 1.38976000

F 2.82675300 0.92329300 2.38426000

### M3<sub>F</sub>

#### Num. Imaginary Frequencies: 0

H -1.11462000 1.65226200 2.77799700

C -1.07469500 1.54821800 1.69412000

C -2.42780800 1.07636300 1.13009700

H -0.75572300 2.48002200 1.23556900

H -2.84029300 1.84311600 0.47451900

H -3.13645700 0.82183400 1.91609100

N -2.20319300 -0.16329700 0.30929100

C -0.45176200 -0.79930800 1.96998100

C 0.18922200 0.34144800 -0.09250400

C -1.71352000 -1.26390300 1.21911500

C -3.42429700 -0.60156800 -0.43785300

C -1.17092600 0.17230800 -0.75919100

H -0.63412400 -0.64684200 3.03348800

H 0.35432500 -1.51660700 1.82075100

H 0.80436300 -0.54652700 -0.22602300

H 0.69517600 1.22385400 -0.47062900

H -1.50093100 -2.12781500 0.59448100

H -2.52552800 -1.48599900 1.90958600

Cl -4.81227900 -0.86954900 0.62585500

H -3.67529400 0.18988800 -1.14082800

H -3.16750900 -1.53272200 -0.94207200

H -1.14061300 -0.64851800 -1.47259400

H -1.49821800 1.10124800 -1.22667800

F 0.47651900 -2.80052800 0.02275200

F 0.57451800 -1.92619000 -2.08494400

F -1.37756100 -2.84634700 -1.32256400

F 0.42971200 -4.20976600 -1.79967200

B 0.05049400 -2.98593900 -1.33270700

F 2.80006900 -1.72808000 2.15578500

F -1.50020400 3.23423900 -0.64028500

F 0.67899300 3.32941700 0.06478100

F -0.08718500 4.85229700 -1.48975600

F 0.18478000 2.62903500 -2.05624600

B -0.16708300 3.55861000 -1.06887200

C 3.26133400 -1.60986100 -0.16855800

C 3.48504100 -0.80326800 -1.28100700

C 3.53249100 0.58212800 -1.15819000

C 3.34722100 1.18823800 0.08230800

### N-H

#### Num. Imaginary Frequencies: 0

H 1.25671400 -0.37585500 3.02544200

C 1.24394500 -0.59152400 1.95763100

C 1.21142600 0.69685900 1.11740000

H 2.10474100 -1.19861000 1.67719200

N -0.00068400 -1.38629900 1.67059500

H 2.09691700 0.78232800 0.49609200

H 1.12248900 1.58057400 1.74592900

N 0.00017500 0.67142500 0.22933800

C -1.24520800 -0.59103000 1.95680200

C -0.00031000 -1.83378400 0.23570400

C -1.21129500 0.69763200 1.11709200

C 0.00065300 1.81966800 -0.74161700

C -0.00009600 -0.57632100 -0.64117700

H -1.25885800 -0.37571000 3.02467000

H -2.10606200 -1.19758700 1.67539500

H -0.90449600 -2.41467800 0.07303000

H 0.90394200 -2.41470500 0.07350300

H -2.09655300 0.78405500 0.49556400

H -1.12171500 1.58104500 1.74595100

Cl 0.00081400 3.38457300 0.08147200

H 0.91115100 1.73082000 -1.33319000

H -0.90963600 1.73123200 -1.33357300

H -0.90616700 -0.52806700 -1.24386600

H 0.90598100 -0.52842100 -1.24388000

F -4.02344900 -0.03730400 0.54411400

F -2.77275800 -1.67217800 -0.42094100

F -2.86894000 0.39353200 -1.38909700

F -4.72541700 -0.98211800 -1.44597800

B -3.66011100 -0.58176700 -0.70265900

F 2.86885300 0.39266500 -1.38951400

F 4.02437600 -0.03663100 0.54340200

|   |             |             |             |
|---|-------------|-------------|-------------|
| F | 4.72470600  | -0.98385500 | -1.44613200 |
| F | 2.77238600  | -1.67198800 | -0.41916500 |
| B | 3.66007700  | -0.58221600 | -0.70253700 |
| H | -0.00105200 | -2.21825100 | 2.26196000  |

**Ph(F)F**

**Num. Imaginary Frequencies: 0**

|   |             |             |             |
|---|-------------|-------------|-------------|
| C | 1.85938700  | -0.69530000 | 0.00000300  |
| C | 1.85918500  | 0.69508400  | 0.00000200  |
| C | 0.65706900  | 1.39650900  | 0.00000000  |
| C | -0.53270200 | 0.69384200  | -0.00000100 |
| C | -0.53247200 | -0.69379600 | -0.00000100 |
| C | 0.65714900  | -1.39641300 | 0.00000200  |
| H | 2.79474200  | -1.24000500 | 0.00000500  |
| H | 2.79441700  | 1.24017300  | 0.00000300  |
| H | 0.62258300  | 2.47856200  | 0.00000000  |
| H | 0.62189100  | -2.47853800 | 0.00000200  |
| F | -1.70232100 | -1.33950700 | -0.00000200 |
| F | -1.70204900 | 1.33953500  | -0.00000300 |

**PhH**

**Num. Imaginary Frequencies: 0**

|   |             |             |             |
|---|-------------|-------------|-------------|
| C | -1.39009000 | 0.06727100  | 0.00000000  |
| C | -0.63671600 | 1.23756600  | -0.00001000 |
| C | 0.75326500  | 1.17008900  | -0.00000100 |
| C | 1.39008600  | -0.06733100 | -0.00000200 |
| C | 0.63677000  | -1.23753800 | -0.00000200 |
| C | -0.75331500 | -1.17005700 | 0.00000600  |
| H | -2.47247900 | 0.11910600  | 0.00000600  |
| H | -1.13288900 | 2.20097800  | 0.00001900  |
| H | 1.33987800  | 2.08134500  | 0.00002100  |
| H | 2.47248200  | -0.11902500 | 0.00001300  |
| H | 1.13282200  | -2.20101200 | -0.00001000 |
| H | -1.33981200 | -2.08138700 | 0.00000100  |

**M1H**

**Num. Imaginary Frequencies: 0**

|   |             |             |             |
|---|-------------|-------------|-------------|
| H | -0.64618100 | -0.12552000 | -2.75897300 |
| C | -0.70819900 | 0.21767700  | -1.72663100 |
| C | 0.23351500  | 1.39719800  | -1.41535800 |
| H | -1.73536900 | 0.45538200  | -1.44748100 |
| N | -0.28551700 | -0.93473400 | -0.87572800 |
| H | -0.27582800 | 2.16418800  | -0.83773300 |

|    |             |             |             |
|----|-------------|-------------|-------------|
| H  | 0.64364100  | 1.81653900  | -2.33215400 |
| N  | 1.38804600  | 0.88997800  | -0.59555200 |
| C  | 1.05295500  | -1.46244200 | -1.28609000 |
| C  | -0.28578800 | -0.54813700 | 0.56847800  |
| C  | 2.01171900  | -0.26056400 | -1.34409500 |
| C  | 2.38335000  | 1.97347900  | -0.29365800 |
| C  | 0.88653000  | 0.42161300  | 0.76148000  |
| H  | 0.92461500  | -1.92734400 | -2.26217400 |
| H  | 1.36197100  | -2.19353800 | -0.54026600 |
| H  | -0.12686500 | -1.46173900 | 1.14049200  |
| H  | -1.24960700 | -0.08754800 | 0.77794100  |
| H  | 2.96191400  | -0.51483300 | -0.88011300 |
| H  | 2.17188200  | 0.08193600  | -2.36483400 |
| Cl | 3.15654800  | 2.58444600  | -1.76137100 |
| H  | 1.83416200  | 2.78111000  | 0.18857000  |
| H  | 3.14252800  | 1.52806100  | 0.34857000  |
| H  | 1.72674300  | -0.06259900 | 1.25147600  |
| H  | 0.55180900  | 1.29983900  | 1.30940600  |
| F  | 3.60672100  | -2.48261500 | -0.25003300 |
| F  | 2.10518400  | -2.18154100 | 1.43828600  |
| F  | 3.73437500  | -0.61702900 | 1.06795300  |
| F  | 4.30507000  | -2.67792500 | 1.94539700  |
| B  | 3.48270700  | -2.03001700 | 1.08134100  |
| F  | -1.20476800 | -1.93843700 | -1.05417000 |
| F  | -0.39389000 | 3.17814400  | 0.94254900  |
| F  | -2.17231800 | 2.01023900  | 0.09972000  |
| F  | -2.52470800 | 3.60962500  | 1.72506100  |
| F  | -1.47066900 | 1.61790100  | 2.23086700  |
| B  | -1.67538600 | 2.64142200  | 1.28798800  |
| C  | -3.63576300 | -1.89822900 | 1.10043400  |
| C  | -3.89720700 | -2.89972700 | 0.16786200  |
| C  | -4.28502900 | -2.56219500 | -1.12560100 |
| C  | -4.41467000 | -1.22258500 | -1.48607800 |
| C  | -4.14839900 | -0.22129700 | -0.55540100 |
| C  | -3.75742800 | -0.55890700 | 0.73954300  |
| H  | -3.34463700 | -2.16148400 | 2.11131000  |
| H  | -3.80468500 | -3.94179600 | 0.45120000  |
| H  | -4.49590800 | -3.34185800 | -1.84858500 |
| H  | -4.73591100 | -0.96066500 | -2.48818100 |
| H  | -4.24875100 | 0.82507100  | -0.82099900 |
| H  | -3.54964800 | 0.22692700  | 1.45816300  |

**TS1S<sub>N</sub>2 H**

**Num. Imaginary Frequencies: 1**

|    |             |             |             |
|----|-------------|-------------|-------------|
| H  | -0.36719800 | 0.18552700  | -2.90774800 |
| C  | -0.53401100 | 0.37949500  | -1.84806000 |
| C  | 0.30261200  | 1.58478800  | -1.34237200 |
| H  | -1.58824200 | 0.56656500  | -1.65099000 |
| N  | -0.12032600 | -0.80232600 | -1.10140100 |
| H  | -0.28812200 | 2.23962600  | -0.70233400 |
| H  | 0.73933200  | 2.14396900  | -2.16802500 |
| N  | 1.43136400  | 1.03506800  | -0.51007000 |
| C  | 1.21261000  | -1.25578400 | -1.47852600 |
| C  | -0.23232900 | -0.60317600 | 0.33547200  |
| C  | 2.14996400  | -0.02235300 | -1.32142500 |
| C  | 2.36862500  | 2.09980300  | -0.03986000 |
| C  | 0.83435500  | 0.43228400  | 0.75288900  |
| H  | 1.20605700  | -1.59664300 | -2.51346200 |
| H  | 1.52816500  | -2.05729500 | -0.81336900 |
| H  | -0.03111800 | -1.54925200 | 0.83531100  |
| H  | -1.23318400 | -0.23748500 | 0.55845600  |
| H  | 3.06873300  | -0.29403000 | -0.80747300 |
| H  | 2.37635900  | 0.43462900  | -2.28377700 |
| Cl | 3.19685000  | 2.90439300  | -1.38372200 |
| H  | 1.77701400  | 2.83893600  | 0.49742400  |
| H  | 3.11137600  | 1.61268300  | 0.59093200  |
| H  | 1.65128200  | -0.03627800 | 1.29619800  |
| H  | 0.38307600  | 1.24816800  | 1.31645800  |
| F  | 3.84486700  | -2.23425700 | -0.24837600 |
| F  | 2.17914300  | -2.14851200 | 1.30855600  |
| F  | 3.73927000  | -0.47532700 | 1.21470600  |
| F  | 4.34776800  | -2.56768400 | 1.98092500  |
| B  | 3.56538800  | -1.89435700 | 1.08927600  |
| F  | -1.62679500 | -1.95189400 | -1.29989200 |
| F  | -0.94789700 | 2.97194800  | 1.18496900  |
| F  | -2.45243300 | 1.77246500  | -0.05524700 |
| F  | -3.20278700 | 3.03499600  | 1.71213300  |
| F  | -1.97646600 | 1.12744200  | 2.08434900  |
| B  | -2.16660600 | 2.25946000  | 1.26226200  |
| C  | -3.46532500 | -1.80468700 | 1.15825200  |
| C  | -3.14802500 | -2.84573600 | 0.32561900  |
| C  | -3.24411000 | -2.67149800 | -1.09813200 |
| C  | -3.96417400 | -1.53285600 | -1.60132000 |
| C  | -4.27014500 | -0.49811200 | -0.75896100 |
| C  | -3.97863600 | -0.61279000 | 0.61380400  |
| H  | -3.30446400 | -1.87360400 | 2.22660200  |
| H  | -2.71775800 | -3.76198400 | 0.71238000  |

|   |             |             |             |
|---|-------------|-------------|-------------|
| H | -3.13725800 | -3.54110000 | -1.73443000 |
| H | -4.15113300 | -1.46324400 | -2.66646000 |
| H | -4.70863200 | 0.41915500  | -1.12975900 |
| H | -4.16241400 | 0.23341100  | 1.26655500  |

**TS1SET H****Num. Imaginary Frequencies: 1**

|    |             |             |             |
|----|-------------|-------------|-------------|
| H  | -0.40283900 | 0.13685100  | -2.89161000 |
| C  | -0.55997000 | 0.35851400  | -1.83654500 |
| C  | 0.28889500  | 1.56282800  | -1.35267000 |
| H  | -1.61266800 | 0.53985200  | -1.62725000 |
| N  | -0.12772000 | -0.80082000 | -1.06370700 |
| H  | -0.29404900 | 2.23246300  | -0.72162400 |
| H  | 0.72567800  | 2.10401500  | -2.18993300 |
| N  | 1.41943700  | 1.01881900  | -0.51668000 |
| C  | 1.19213800  | -1.28630900 | -1.44664600 |
| C  | -0.25124700 | -0.59563900 | 0.37261000  |
| C  | 2.12979300  | -0.05181800 | -1.31958600 |
| C  | 2.36281800  | 2.08932000  | -0.06772500 |
| C  | 0.83094800  | 0.43508700  | 0.76136300  |
| H  | 1.16126900  | -1.64672500 | -2.47379900 |
| H  | 1.50106700  | -2.07701700 | -0.76582900 |
| H  | -0.06008300 | -1.54191200 | 0.87552000  |
| H  | -1.24941100 | -0.21874200 | 0.58287200  |
| H  | 3.05315300  | -0.31875300 | -0.81174100 |
| H  | 2.34618900  | 0.38923700  | -2.29138700 |
| Cl | 3.18890600  | 2.86402500  | -1.42899600 |
| H  | 1.77413600  | 2.83928000  | 0.45796400  |
| H  | 3.10531200  | 1.60995900  | 0.56939000  |
| H  | 1.65036600  | -0.03236800 | 1.30139400  |
| H  | 0.38927300  | 1.25986800  | 1.31914900  |
| F  | 3.81465300  | -2.25188200 | -0.24029900 |
| F  | 2.16313300  | -2.14024400 | 1.32908100  |
| F  | 3.72918000  | -0.47550400 | 1.20197100  |
| F  | 4.33602200  | -2.56121900 | 1.98876200  |
| B  | 3.54983300  | -1.89619400 | 1.09663500  |
| F  | -1.51789300 | -1.98745400 | -1.32911100 |
| F  | -0.88739900 | 3.00377100  | 1.14535200  |
| F  | -2.42326500 | 1.80331600  | -0.05446500 |
| F  | -3.13407800 | 3.11120200  | 1.69829900  |
| F  | -1.92960700 | 1.19156600  | 2.09027700  |
| B  | -2.11893100 | 2.31000200  | 1.25167500  |
| C  | -3.48091500 | -1.77710400 | 1.17119200  |
| C  | -3.19702400 | -2.84609600 | 0.35677400  |
| C  | -3.35400100 | -2.71914700 | -1.05343900 |

|   |             |             |             |
|---|-------------|-------------|-------------|
| C | -3.98556100 | -1.55845800 | -1.58724600 |
| C | -4.25716100 | -0.49384500 | -0.76555600 |
| C | -3.97953700 | -0.58740300 | 0.61110700  |
| H | -3.30683000 | -1.82862600 | 2.23869100  |
| H | -2.78538700 | -3.76308800 | 0.76047900  |
| H | -3.20512900 | -3.58495800 | -1.68563600 |
| H | -4.17395700 | -1.50535000 | -2.65266000 |
| H | -4.66490900 | 0.42865000  | -1.15882600 |
| H | -4.15088900 | 0.27235100  | 1.24832000  |

|   |            |             |             |
|---|------------|-------------|-------------|
| F | 2.18250900 | -0.94951000 | -0.92420500 |
| F | 3.33025400 | -2.49840900 | 0.31445500  |
| F | 1.37898700 | -1.59308500 | 1.12757000  |
| B | 2.06591900 | -2.06048800 | -0.04061700 |
| C | 1.76550900 | 1.63379500  | 0.94897000  |
| C | 2.24397100 | 1.81399000  | -0.31797300 |
| C | 3.58779500 | 1.32960500  | -0.65199200 |
| C | 4.17629300 | 0.31316300  | 0.22527800  |
| C | 3.68958300 | 0.16509700  | 1.49012300  |
| C | 2.48674300 | 0.80929800  | 1.83095300  |
| H | 0.80754300 | 2.05874600  | 1.23129300  |
| H | 1.69623000 | 2.40213200  | -1.04880000 |
| H | 4.17634000 | 2.23290500  | -0.31964500 |
| H | 5.03038600 | -0.24396200 | -0.14426800 |
| H | 4.13396800 | -0.54733200 | 2.17120800  |
| H | 2.07010900 | 0.62297700  | 2.81583700  |

## M2<sub>H</sub>

### Num. Imaginary Frequencies: 0

|    |             |             |             |
|----|-------------|-------------|-------------|
| H  | -2.31819100 | -3.36672900 | -2.01834300 |
| C  | -1.71910200 | -2.50327100 | -1.72555300 |
| C  | -1.70807700 | -2.37537900 | -0.18243300 |
| H  | -0.70069100 | -2.65316600 | -2.08688900 |
| N  | -2.26822000 | -1.29620100 | -2.34621600 |
| H  | -0.76429300 | -2.70878300 | 0.25016100  |
| H  | -2.54049200 | -2.89646800 | 0.28945600  |
| N  | -1.87307500 | -0.91359600 | 0.14779300  |
| C  | -3.52242500 | -0.94257400 | -1.68411200 |
| C  | -1.31973400 | -0.19654100 | -2.15737000 |
| C  | -3.26346300 | -0.47176800 | -0.23080500 |
| C  | -1.56509800 | -0.61165300 | 1.57419200  |
| C  | -0.87196100 | -0.13195300 | -0.68466900 |
| H  | -4.17693100 | -1.81659700 | -1.69946800 |
| H  | -4.01122500 | -0.14062300 | -2.23854400 |
| H  | -1.79915200 | 0.74108000  | -2.44340400 |
| H  | -0.44598500 | -0.35647500 | -2.79073500 |
| H  | -3.27359500 | 0.61484000  | -0.13776600 |
| H  | -3.95422900 | -0.91769000 | 0.48357800  |
| Cl | -2.55789500 | -1.56641400 | 2.69787600  |
| H  | -0.52197400 | -0.87268200 | 1.73803900  |
| H  | -1.76317500 | 0.44539200  | 1.74035900  |
| H  | -0.85670200 | 0.88470900  | -0.30539100 |
| H  | 0.09152900  | -0.60712500 | -0.52258300 |
| F  | -2.50083100 | 2.52041900  | -0.66455100 |
| F  | -0.28188300 | 3.08691200  | -0.65295900 |
| F  | -1.30074900 | 2.45529600  | 1.28633800  |
| F  | -1.82678400 | 4.48927600  | 0.33119700  |
| B  | -1.50199400 | 3.18836900  | 0.07018900  |
| F  | 3.82739400  | 1.15052800  | -1.97309300 |
| F  | 1.29043200  | -3.04006800 | -0.64414400 |

## M3<sub>H</sub>

### Num. Imaginary Frequencies: 0

|    |             |             |             |
|----|-------------|-------------|-------------|
| H  | 0.93300000  | -0.15560100 | 2.50675700  |
| C  | 0.89627500  | 0.27692700  | 1.50603400  |
| C  | -0.11129900 | 1.43120400  | 1.39093500  |
| H  | 1.88081000  | 0.62430600  | 1.20437800  |
| N  | 0.47380300  | -0.81688800 | 0.57335500  |
| H  | 0.29655900  | 2.25563600  | 0.80757500  |
| H  | -0.42683900 | 1.77749100  | 2.37355100  |
| N  | -1.33273900 | 0.92778400  | 0.67051500  |
| C  | -0.78871400 | -1.45383200 | 1.07075900  |
| C  | 0.25317700  | -0.27997500 | -0.81124200 |
| C  | -1.79618300 | -0.33091500 | 1.36204900  |
| C  | -2.41526800 | 1.96066400  | 0.60424000  |
| C  | -0.97155600 | 0.63450000  | -0.77672700 |
| H  | -0.55528200 | -2.01307800 | 1.97605600  |
| H  | -1.15885800 | -2.12477800 | 0.29778600  |
| H  | 0.06606000  | -1.12974000 | -1.46641600 |
| H  | 1.14964800  | 0.25810500  | -1.10295100 |
| H  | -2.78363900 | -0.59488800 | 0.99088100  |
| H  | -1.84909000 | -0.09460600 | 2.42370700  |
| Cl | -3.04170200 | 2.37503500  | 2.20608200  |
| H  | -1.98064600 | 2.85092500  | 0.15188700  |
| H  | -3.22175800 | 1.53315200  | 0.00949300  |
| H  | -1.84223600 | 0.16217100  | -1.22450600 |
| H  | -0.73997600 | 1.58628200  | -1.25306700 |



|   |             |             |             |
|---|-------------|-------------|-------------|
| F | -3.41276400 | -2.53295900 | 0.21495400  |
| F | -2.13596800 | -1.97707000 | -1.59235100 |
| F | -3.79341700 | -0.56330600 | -0.88669200 |
| F | -4.34845400 | -2.56631300 | -1.89664300 |
| B | -3.46586900 | -1.94623300 | -1.06763800 |
| F | 0.47015100  | 3.36455300  | -0.85935700 |
| F | 2.26632300  | 2.02215100  | -0.37860800 |
| F | 2.52439400  | 3.80867600  | -1.81582500 |
| F | 1.30936400  | 1.94978500  | -2.44983800 |
| B | 1.66993500  | 2.82653200  | -1.41394700 |
| C | 3.17743400  | -2.81022700 | 1.17642100  |
| C | 2.74015700  | -3.34602700 | -0.03616000 |
| C | 2.81626300  | -2.59223700 | -1.20676000 |
| C | 3.33563300  | -1.29840700 | -1.16923800 |
| C | 3.77723400  | -0.74762500 | 0.03093100  |
| H | 2.34618200  | -4.35488300 | -0.06312000 |
| H | 3.38212700  | -0.69933700 | -2.07173500 |
| H | 3.14418200  | -3.37507300 | 2.10007200  |
| H | 2.47356500  | -3.01256600 | -2.14430400 |
| C | 3.68800700  | -1.52038800 | 1.17865100  |
| F | 4.07691000  | -0.98713500 | 2.34818900  |
| H | 1.21861400  | -1.52208900 | 0.52538800  |
| H | 4.15292300  | 0.26780100  | 0.08220200  |

### M1<sub>CH3</sub>

Num. Imaginary Frequencies: 0

|    |             |             |             |
|----|-------------|-------------|-------------|
| H  | 1.08716400  | 0.04061700  | 2.25790200  |
| C  | 0.74275000  | 0.32672700  | 1.26514500  |
| C  | -0.41753700 | 1.33817700  | 1.30269900  |
| H  | 1.57186100  | 0.69565100  | 0.66080100  |
| N  | 0.24544000  | -0.92292600 | 0.60766600  |
| H  | -0.12476900 | 2.27785900  | 0.84424600  |
| H  | -0.75844000 | 1.51496200  | 2.32054000  |
| N  | -1.58355300 | 0.76897100  | 0.54375200  |
| C  | -0.95084800 | -1.50699700 | 1.29127700  |
| C  | -0.04099000 | -0.66436500 | -0.83166400 |
| C  | -2.06059900 | -0.43771400 | 1.30273000  |
| C  | -2.68115400 | 1.78248600  | 0.36435500  |
| C  | -1.16556500 | 0.38512300  | -0.86895500 |
| H  | -0.62820900 | -1.78805200 | 2.29252400  |
| H  | -1.25892000 | -2.37901800 | 0.71429500  |
| H  | -0.36424700 | -1.60714600 | -1.26615000 |
| H  | 0.88057300  | -0.28466200 | -1.26796200 |
| H  | -2.96766200 | -0.81206600 | 0.83941100  |
| H  | -2.27819800 | -0.10906000 | 2.31656400  |
| Cl | -3.30746800 | 2.35616300  | 1.91353200  |
| H  | -2.24534400 | 2.62168400  | -0.17636300 |
| H  | -3.48141200 | 1.28322900  | -0.18026500 |
| H  | -2.05152200 | -0.02571300 | -1.35021500 |
| H  | -0.81482000 | 1.29962000  | -1.34501500 |
| F  | -3.80520700 | -2.66042000 | 0.39194500  |
| F  | -2.32037400 | -2.30799700 | -1.29285400 |
| F  | -4.01746800 | -0.81899600 | -0.95590500 |
| F  | -4.49142700 | -2.91642300 | -1.80220200 |
| B  | -3.70649500 | -2.21899500 | -0.94062300 |
| F  | 1.25434400  | -1.85288300 | 0.68176500  |
| F  | -0.13679200 | 3.35319400  | -0.90332100 |
| F  | 1.78784100  | 3.02644000  | 0.30365400  |
| F  | 1.90147500  | 3.99198800  | -1.79038200 |
| F  | 1.36913000  | 1.76028900  | -1.53895500 |
| B  | 1.26318600  | 3.08132100  | -1.00834600 |
| C  | 3.63626400  | -1.82522700 | -1.51526700 |
| C  | 3.49916100  | -0.43985400 | -1.50483700 |
| C  | 3.82682800  | 0.27386100  | -0.35412800 |
| C  | 4.28787400  | -0.39921200 | 0.77442900  |
| C  | 4.42952000  | -1.78880000 | 0.77666600  |
| C  | 4.09349500  | -2.49156200 | -0.38218500 |
| H  | 3.14382300  | 0.09266000  | -2.37926500 |

### Ph(CH<sub>3</sub>)H

Num. Imaginary Frequencies: 0

|   |             |             |             |
|---|-------------|-------------|-------------|
| C | 1.19405300  | -1.20270100 | 0.00199800  |
| C | 1.89708000  | -0.00190600 | 0.00756600  |
| C | 1.19839400  | 1.20024900  | 0.00199300  |
| C | -0.19298000 | 1.19948200  | -0.00815400 |
| C | -0.90937700 | 0.00260200  | -0.01044000 |
| C | -0.19623100 | -1.19742900 | -0.00821400 |
| H | 1.72964100  | -2.14498400 | 0.00162400  |
| H | 2.98043300  | -0.00376500 | 0.01248100  |
| H | 1.73666900  | 2.14099200  | 0.00161500  |
| H | -0.73201200 | 2.14128100  | -0.01653300 |
| H | -0.73876200 | -2.13742400 | -0.01649400 |
| C | -2.41640900 | 0.00086600  | 0.00860000  |
| H | -2.81656600 | -0.82439300 | -0.58304500 |
| H | -2.78962400 | -0.11281900 | 1.03021600  |
| H | -2.81696800 | 0.93413800  | -0.38995300 |

|   |            |             |             |
|---|------------|-------------|-------------|
| H | 4.55402600 | 0.16458700  | 1.66388300  |
| H | 4.19807100 | -3.57191600 | -0.39785000 |
| H | 3.39034200 | -2.38905600 | -2.40830900 |
| H | 3.71363400 | 1.35295000  | -0.34036300 |
| C | 4.96989800 | -2.51061900 | 1.98425400  |
| H | 6.05230300 | -2.64125400 | 1.89944100  |
| H | 4.77755900 | -1.95076800 | 2.90102400  |
| H | 4.52620400 | -3.50269700 | 2.08518300  |

|   |            |             |             |
|---|------------|-------------|-------------|
| F | 2.69412000 | 3.40607300  | -1.83531800 |
| F | 1.52620900 | 1.46805500  | -2.24492900 |
| B | 1.74468200 | 2.54250400  | -1.35664800 |
| C | 3.12376800 | -2.69766700 | -0.78955100 |
| C | 3.26864800 | -1.63819900 | -1.64335800 |
| C | 3.71200300 | -0.39768200 | -1.13723400 |
| C | 4.09503700 | -0.24764100 | 0.19959500  |
| C | 3.95861000 | -1.29603700 | 1.08432100  |
| C | 3.32466400 | -2.50311600 | 0.61572900  |
| H | 3.03268200 | -1.73093300 | -2.69580300 |
| H | 4.45806900 | 0.71488100  | 0.53861600  |
| H | 3.32925000 | -3.37079400 | 1.26556100  |
| H | 2.75971200 | -3.65610500 | -1.13972800 |
| H | 3.75831800 | 0.46046000  | -1.79903900 |
| C | 4.26677600 | -1.16461300 | 2.53895400  |
| H | 4.89991100 | -1.98648900 | 2.88232900  |
| H | 4.75977000 | -0.21872400 | 2.75911000  |
| H | 3.33338700 | -1.21595600 | 3.11153700  |

**TS1S<sub>N</sub>2 CH3**

**Num. Imaginary Frequencies: 1**

|    |             |             |             |
|----|-------------|-------------|-------------|
| H  | 0.44868100  | 0.07950900  | 2.79257200  |
| C  | 0.51598200  | 0.35124400  | 1.73851600  |
| C  | -0.43132300 | 1.52694800  | 1.38351100  |
| H  | 1.53723800  | 0.62077800  | 1.47357700  |
| N  | 0.11577000  | -0.80693300 | 0.94781000  |
| H  | 0.06821900  | 2.26829000  | 0.76018800  |
| H  | -0.84593100 | 1.99232800  | 2.27601400  |
| N  | -1.57754000 | 0.96021300  | 0.58878600  |
| C  | -1.15697000 | -1.36601900 | 1.38882700  |
| C  | 0.10976500  | -0.52234500 | -0.47837000 |
| C  | -2.17416700 | -0.18854800 | 1.37401900  |
| C  | -2.60347600 | 1.99297000  | 0.24867900  |
| C  | -1.03482300 | 0.47754700  | -0.74946000 |
| H  | -1.05261400 | -1.76610800 | 2.39693600  |
| H  | -1.47118000 | -2.14635000 | 0.69820300  |
| H  | -0.08521400 | -1.44885900 | -1.01618200 |
| H  | 1.07467500  | -0.09766300 | -0.75318900 |
| H  | -3.10905100 | -0.48560600 | 0.90514000  |
| H  | -2.36082700 | 0.19498400  | 2.37596200  |
| Cl | -3.38860800 | 2.65920900  | 1.69108700  |
| H  | -2.09061100 | 2.79882800  | -0.27337200 |
| H  | -3.35658100 | 1.50166500  | -0.36623300 |
| H  | -1.86137300 | 0.00032100  | -1.26963800 |
| H  | -0.66931700 | 1.35400300  | -1.28239200 |
| F  | -3.81310400 | -2.42677900 | 0.28167300  |
| F  | -2.27428700 | -2.15269600 | -1.37995000 |
| F  | -3.90798600 | -0.57947600 | -1.06911400 |
| F  | -4.46155200 | -2.65271900 | -1.92382300 |
| B  | -3.65129500 | -1.99153300 | -1.04829900 |
| F  | 1.66289800  | -1.86933100 | 0.97733000  |
| F  | 0.50547300  | 3.18141400  | -1.11052300 |
| F  | 2.17574000  | 1.97458300  | -0.11369700 |

**TS1SET CH3**

**Num. Imaginary Frequencies: 1**

|    |             |             |             |
|----|-------------|-------------|-------------|
| H  | 0.46784700  | 0.04889500  | 2.78441200  |
| C  | 0.53126300  | 0.34517300  | 1.73752700  |
| C  | -0.43036600 | 1.51141300  | 1.39491000  |
| H  | 1.55127900  | 0.61540200  | 1.46941400  |
| N  | 0.12474300  | -0.79581000 | 0.92301200  |
| H  | 0.06036600  | 2.26368200  | 0.77873600  |
| H  | -0.84722200 | 1.96176700  | 2.29386100  |
| N  | -1.57433400 | 0.94158400  | 0.59649600  |
| C  | -1.13288600 | -1.39151200 | 1.36028100  |
| C  | 0.13156900  | -0.50070000 | -0.50306600 |
| C  | -2.15703800 | -0.22175500 | 1.37168200  |
| C  | -2.61042700 | 1.97089000  | 0.27287800  |
| C  | -1.03819500 | 0.47547500  | -0.75132600 |
| H  | -1.00728700 | -1.80897100 | 2.35823500  |
| H  | -1.43448000 | -2.16183800 | 0.65319100  |
| H  | -0.03845200 | -1.42757100 | -1.04823900 |
| H  | 1.08830600  | -0.05010200 | -0.76022600 |
| H  | -3.09281100 | -0.52170500 | 0.90647000  |
| H  | -2.33810200 | 0.14546000  | 2.38061800  |
| Cl | -3.39827300 | 2.60648900  | 1.72649200  |
| H  | -2.10354400 | 2.78783500  | -0.23800900 |
| H  | -3.35957400 | 1.48154600  | -0.34848700 |

|   |             |             |             |    |             |             |             |
|---|-------------|-------------|-------------|----|-------------|-------------|-------------|
| H | -1.86196500 | -0.01475900 | -1.26307000 | C  | 0.79346600  | -0.38816500 | -0.33283200 |
| H | -0.69493200 | 1.36012500  | -1.28508500 | H  | 1.91382000  | -0.70591000 | 3.35966700  |
| F | -3.76000400 | -2.46988900 | 0.27096700  | H  | 1.35245300  | 0.88590100  | 2.81911600  |
| F | -2.24090800 | -2.15936600 | -1.40196100 | H  | -0.12862100 | 1.00237700  | 1.03923000  |
| F | -3.89170800 | -0.61081900 | -1.05945600 | H  | -1.15160000 | -0.41007700 | 0.58317900  |
| F | -4.42700100 | -2.68220700 | -1.93098200 | H  | 2.70981000  | 0.86153700  | 0.92257200  |
| B | -3.61771500 | -2.02041700 | -1.05702200 | H  | 3.54322400  | -0.53685400 | 1.65519600  |
| F | 1.57934400  | -1.89675600 | 1.02449600  | Cl | 4.51898600  | -1.93857300 | -0.44535000 |
| F | 0.41887000  | 3.20544400  | -1.06910400 | H  | 2.54127600  | -1.65554900 | -1.68682100 |
| F | 2.12442800  | 2.02070200  | -0.10638700 | H  | 3.26449400  | -0.07803800 | -1.18760200 |
| F | 2.59501100  | 3.50539700  | -1.79865600 | H  | 1.08412400  | 0.50505700  | -0.88458000 |
| F | 1.47749600  | 1.54293900  | -2.24351800 | H  | 0.36838400  | -1.12975300 | -1.00741000 |
| B | 1.67590600  | 2.60396200  | -1.33620600 | F  | 1.24746500  | 2.66656900  | 0.56964500  |
| C | 3.28701300  | -1.57588300 | -1.66768300 | F  | 0.75895400  | 2.67927700  | -1.65789200 |
| C | 3.17820100  | -2.66756700 | -0.84407900 | F  | 2.83620100  | 2.01390500  | -0.94689800 |
| C | 3.44025700  | -2.52554500 | 0.54359800  | F  | 2.22480200  | 4.23577500  | -0.80469800 |
| C | 3.98444900  | -1.30597500 | 1.05961100  | B  | 1.78872900  | 2.94094900  | -0.72146300 |
| C | 4.08038500  | -0.22185800 | 0.20975200  | F  | -2.03211900 | 2.10583800  | 2.08334600  |
| C | 3.71032800  | -0.34091100 | -1.13316300 | F  | -0.75151900 | -3.15384100 | -0.89859400 |
| H | 3.03576100  | -1.64292100 | -2.71889300 | F  | -2.47456600 | -2.10699000 | 0.19871000  |
| H | 2.83135700  | -3.62171600 | -1.22138900 | F  | -2.90237300 | -3.23573000 | -1.75316100 |
| H | 3.41848600  | -3.40025700 | 1.18338900  | F  | -1.69901600 | -1.27937000 | -1.79927400 |
| H | 4.41070200  | 0.74062100  | 0.58163800  | B  | -1.97357600 | -2.48184800 | -1.07813800 |
| H | 3.73821400  | 0.53537700  | -1.77106400 | C  | -1.73999000 | 2.40493700  | -0.26456000 |
| C | 4.31557700  | -1.21936500 | 2.51543000  | C  | -1.99696600 | 1.92331500  | -1.50731600 |
| H | 3.42843400  | -1.46049200 | 3.10920500  | C  | -2.98644200 | 0.92107700  | -1.66185800 |
| H | 5.08907700  | -1.94521900 | 2.78084500  | C  | -3.68982600 | 0.35526600  | -0.59152400 |
| H | 4.66484300  | -0.22389100 | 2.78697000  | C  | -3.40532900 | 0.75041000  | 0.69076400  |

## M2<sub>CH3</sub>

### Num. Imaginary Frequencies: 0

|   |             |             |             |
|---|-------------|-------------|-------------|
| H | 0.69720300  | -2.68763600 | 2.71543500  |
| C | 0.49510600  | -2.16275300 | 1.78042600  |
| C | 1.68470300  | -2.36003300 | 0.80441100  |
| H | -0.41498200 | -2.56626400 | 1.33805400  |
| N | 0.28382900  | -0.74469800 | 2.06615300  |
| H | 1.40958200  | -2.99818000 | -0.03604800 |
| H | 2.57667500  | -2.74819400 | 1.29477200  |
| N | 2.05396600  | -1.00864700 | 0.24235600  |
| C | 1.54051100  | -0.14098400 | 2.50315900  |
| C | -0.14883000 | -0.06860500 | 0.84403100  |
| C | 2.57856500  | -0.12999900 | 1.35390800  |
| C | 3.02054400  | -1.09533400 | -0.88721300 |

## M3<sub>CH3</sub>

### Num. Imaginary Frequencies: 0

|   |             |            |            |
|---|-------------|------------|------------|
| H | -0.18323600 | 1.91852300 | 2.68161300 |
| C | -0.25901600 | 1.77857000 | 1.60352000 |

|    |             |             |             |
|----|-------------|-------------|-------------|
| C  | -1.71728700 | 1.91169900  | 1.12556100  |
| H  | 0.39321600  | 2.47433500  | 1.08210200  |
| H  | -1.80607300 | 2.76113100  | 0.44865900  |
| H  | -2.41695800 | 2.00607100  | 1.95394000  |
| N  | -2.08927900 | 0.67007800  | 0.36432200  |
| C  | -0.66490500 | -0.60552100 | 1.96669700  |
| C  | 0.26391500  | 0.10380200  | -0.17511000 |
| C  | -2.05339200 | -0.50593000 | 1.31034100  |
| C  | -3.42671600 | 0.76901300  | -0.30074500 |
| C  | -1.08244400 | 0.50528900  | -0.76813600 |
| H  | -0.68779800 | -0.37352300 | 3.03115200  |
| H  | -0.24499600 | -1.59634000 | 1.79838600  |
| H  | 0.44566100  | -0.96398600 | -0.28845900 |
| H  | 1.07012400  | 0.68094200  | -0.61791300 |
| H  | -2.27821300 | -1.39563300 | 0.72740600  |
| H  | -2.83086300 | -0.33501200 | 2.05291000  |
| Cl | -4.72862800 | 1.13601200  | 0.84036100  |
| H  | -3.36800200 | 1.57500500  | -1.02899400 |
| H  | -3.61629000 | -0.19617600 | -0.76899200 |
| H  | -1.44532900 | -0.27062300 | -1.43958800 |
| H  | -1.01931800 | 1.47161700  | -1.26930500 |
| F  | -0.82828600 | -2.88827600 | 0.12923900  |
| F  | -0.46165800 | -2.19182000 | -2.01472100 |
| F  | -2.58104300 | -2.15757200 | -1.15249000 |
| F  | -1.56677500 | -4.18017800 | -1.63028100 |
| B  | -1.35441200 | -2.90282400 | -1.20264300 |
| F  | 2.48085300  | -1.21604200 | 2.70556300  |
| F  | -0.10556100 | 3.46291100  | -0.76286300 |
| F  | 1.96156400  | 2.63605500  | -0.22137800 |
| F  | 1.77627300  | 4.29762100  | -1.81056200 |
| F  | 1.02614900  | 2.15840700  | -2.25504400 |
| B  | 1.19290900  | 3.17371600  | -1.30477500 |
| C  | 2.21867100  | -2.60352900 | 0.81518700  |
| C  | 2.37049200  | -2.78353400 | -0.55622900 |
| C  | 3.01277000  | -1.80952500 | -1.31394500 |
| C  | 3.50866400  | -0.65909000 | -0.70788100 |
| C  | 3.37309400  | -0.44464600 | 0.66586000  |
| C  | 2.71803600  | -1.44386200 | 1.37697200  |
| H  | 1.95341600  | -3.66348100 | -1.02889200 |
| H  | 3.98666200  | 0.10875900  | -1.30639200 |
| H  | 1.69995200  | -3.32816300 | 1.43070200  |
| H  | 3.10536700  | -1.93532600 | -2.38526000 |
| C  | 3.89262600  | 0.79193600  | 1.35087500  |
| H  | 4.72673200  | 0.54386500  | 2.01147200  |

|   |            |            |            |
|---|------------|------------|------------|
| H | 4.21752200 | 1.52373100 | 0.61381300 |
| H | 3.13171700 | 1.27756900 | 1.97031600 |
| H | 1.17860400 | 0.28981300 | 1.66118900 |
| N | 0.22379100 | 0.39310100 | 1.30369500 |

**Ph(CH<sub>3</sub>)F**

**Num. Imaginary Frequencies: 0**

|   |             |             |             |
|---|-------------|-------------|-------------|
| C | -1.78997600 | -0.93758500 | -0.00002200 |
| C | -1.99529100 | 0.43721800  | 0.00003400  |
| C | -0.90456200 | 1.30122800  | 0.00006600  |
| C | 0.36556000  | 0.75817100  | 0.00002100  |
| C | 0.61744300  | -0.60871400 | -0.00002800 |
| C | -0.49502500 | -1.44847400 | -0.00008000 |
| H | -2.63630400 | -1.61330400 | -0.00005900 |
| H | -3.00026000 | 0.84087500  | 0.00009600  |
| H | -1.02207800 | 2.37751400  | 0.00011400  |
| H | -0.33705900 | -2.52159600 | -0.00014200 |
| C | 2.03190700  | -1.11768700 | 0.00008400  |
| H | 2.04585300  | -2.20736900 | 0.00022700  |
| H | 2.57428200  | -0.76247100 | -0.87878400 |
| H | 2.57402900  | -0.76218500 | 0.87900600  |
| F | 1.42457800  | 1.59373300  | -0.00010100 |

**Ph(NH<sub>2</sub>)H**

**Num. Imaginary Frequencies: 0**

|   |             |             |             |
|---|-------------|-------------|-------------|
| C | 1.16749100  | -1.19853900 | 0.00365800  |
| C | 1.87439500  | 0.00000000  | 0.00881400  |
| C | 1.16752200  | 1.19852700  | 0.00364800  |
| C | -0.22086700 | 1.20379000  | -0.00601600 |
| C | -0.93303700 | 0.00001300  | -0.00876600 |
| C | -0.22087100 | -1.20379300 | -0.00602000 |
| H | 2.95682300  | -0.00004700 | 0.01665400  |
| H | -0.76319000 | 2.14344700  | -0.01650500 |
| H | -0.76325100 | -2.14341700 | -0.01651300 |
| H | 1.70085400  | -2.14214900 | 0.00714100  |
| H | 1.70083900  | 2.14216200  | 0.00713100  |
| N | -2.32790500 | 0.00000600  | -0.07405300 |
| H | -2.77226200 | -0.83609900 | 0.27424700  |
| H | -2.77227100 | 0.83607900  | 0.27431200  |

**M1<sub>NH2</sub>****Num. Imaginary Frequencies: 0**

|    |             |             |             |
|----|-------------|-------------|-------------|
| H  | 0.70037500  | -0.20064500 | 2.63131600  |
| C  | 0.68561300  | 0.18546700  | 1.61274300  |
| C  | -0.30508300 | 1.34926800  | 1.40376700  |
| H  | 1.68937800  | 0.45997500  | 1.28758300  |
| N  | 0.24357800  | -0.94240300 | 0.73786600  |
| H  | 0.14571200  | 2.15211800  | 0.82622100  |
| H  | -0.66871600 | 1.72225500  | 2.35940900  |
| N  | -1.49427900 | 0.83985100  | 0.63547000  |
| C  | -1.05387200 | -1.52567700 | 1.20065000  |
| C  | 0.15174400  | -0.49246300 | -0.68455500 |
| C  | -2.03696300 | -0.35664500 | 1.37501600  |
| C  | -2.53730300 | 1.90211900  | 0.44029600  |
| C  | -1.06752800 | 0.43436200  | -0.76692800 |
| H  | -0.85420100 | -2.03212000 | 2.14339800  |
| H  | -1.38799900 | -2.22966700 | 0.44003400  |
| H  | -0.00371600 | -1.38535600 | -1.28947200 |
| H  | 1.08592100  | 0.01490000  | -0.92418200 |
| H  | -3.00967900 | -0.61955100 | 0.96576500  |
| H  | -2.13551500 | -0.06202000 | 2.41831500  |
| Cl | -3.23916700 | 2.42265200  | 1.97707300  |
| H  | -2.04311600 | 2.74688100  | -0.03753200 |
| H  | -3.32012400 | 1.45933600  | -0.17464200 |
| H  | -1.92034400 | -0.06848000 | -1.21517400 |
| H  | -0.80599700 | 1.34033400  | -1.30775300 |
| F  | -3.64920000 | -2.57569700 | 0.30112800  |
| F  | -2.27084900 | -2.17882000 | -1.47134300 |
| F  | -3.90835900 | -0.67080300 | -0.93900800 |
| F  | -4.48715100 | -2.71551800 | -1.84845700 |
| B  | -3.62377900 | -2.07475800 | -1.01875400 |
| F  | 1.19361100  | -1.92950600 | 0.81842400  |
| F  | 0.03953400  | 3.26699200  | -0.93965600 |
| F  | 1.91795900  | 2.13747000  | -0.29015800 |
| F  | 2.08508800  | 3.81494800  | -1.86580500 |
| F  | 1.06678700  | 1.80621700  | -2.37713700 |
| B  | 1.30747800  | 2.79550800  | -1.40932200 |
| C  | 3.89188300  | -2.78732200 | -0.55065100 |
| C  | 3.66341600  | -1.84784200 | -1.55347500 |
| C  | 3.66124000  | -0.49443200 | -1.22655300 |
| C  | 3.87206400  | -0.08565700 | 0.08572700  |
| C  | 4.07938700  | -1.02922800 | 1.09515100  |
| C  | 4.09694900  | -2.38738800 | 0.76420700  |
| H  | 3.50413000  | -2.16545100 | -2.57633900 |

|   |            |             |             |
|---|------------|-------------|-------------|
| H | 3.86043500 | 0.97336000  | 0.32199600  |
| H | 4.26333100 | -3.12809500 | 1.53998600  |
| H | 3.90953000 | -3.84398300 | -0.79214900 |
| H | 3.48629700 | 0.25803600  | -1.98847100 |
| N | 4.17051100 | -0.61036900 | 2.43445100  |
| H | 4.62629800 | -1.27881800 | 3.04082800  |
| H | 4.59061100 | 0.30368000  | 2.54224300  |

**TS1S<sub>N</sub>2 NH2****Num. Imaginary Frequencies: 1**

|    |             |             |             |
|----|-------------|-------------|-------------|
| H  | -0.12066700 | 0.56742800  | -2.91044000 |
| C  | -0.31619100 | 0.73803100  | -1.85140400 |
| C  | 0.65202800  | 1.77968600  | -1.23928000 |
| H  | -1.34778800 | 1.05713400  | -1.69573600 |
| N  | -0.10918100 | -0.52004100 | -1.14894300 |
| H  | 0.13601700  | 2.45775400  | -0.56033300 |
| H  | 1.17902700  | 2.33539100  | -2.01311400 |
| N  | 1.67844400  | 1.02532100  | -0.43224000 |
| C  | 1.15371600  | -1.15632700 | -1.51587600 |
| C  | -0.23440100 | -0.37189200 | 0.29853400  |
| C  | 2.25028600  | -0.07681300 | -1.30160800 |
| C  | 2.74996500  | 1.91512800  | 0.10897200  |
| C  | 0.98511000  | 0.43143700  | 0.78715300  |
| H  | 1.11640700  | -1.46246000 | -2.56085200 |
| H  | 1.32664500  | -2.01502600 | -0.87021300 |
| H  | -0.23612200 | -1.36619900 | 0.74761100  |
| H  | -1.16344400 | 0.14932500  | 0.51097400  |
| H  | 3.12191600  | -0.49915600 | -0.80721700 |
| H  | 2.54077700  | 0.39637000  | -2.23860200 |
| Cl | 3.72199600  | 2.65154700  | -1.17579600 |
| H  | 2.26039200  | 2.70731100  | 0.67266200  |
| H  | 3.39610600  | 1.29310400  | 0.72713600  |
| H  | 1.71524700  | -0.19767300 | 1.28908700  |
| H  | 0.66175000  | 1.26407700  | 1.41187600  |
| F  | 3.57655600  | -2.56232800 | -0.35666500 |
| F  | 1.94448600  | -2.33242200 | 1.22170000  |
| F  | 3.72648000  | -0.89448900 | 1.20494100  |
| F  | 4.03371700  | -3.09307700 | 1.84464300  |
| B  | 3.35150200  | -2.26620300 | 1.00252300  |
| F  | -1.61430500 | -1.42042200 | -1.46873200 |
| F  | -0.54720400 | 3.12663300  | 1.22720600  |
| F  | -2.23964500 | 2.18128100  | -0.00324500 |
| F  | -2.75024000 | 3.55966600  | 1.76800800  |

|   |             |             |             |
|---|-------------|-------------|-------------|
| F | -1.84373100 | 1.47212500  | 2.13417800  |
| B | -1.86469300 | 2.61806800  | 1.32650500  |
| C | -3.36741300 | -3.17881300 | -0.64763600 |
| C | -3.29487400 | -3.11964800 | 0.71520300  |
| C | -3.43562000 | -1.86637700 | 1.37211500  |
| C | -3.67465200 | -0.70724900 | 0.68147400  |
| C | -3.74403000 | -0.74277000 | -0.72911700 |
| C | -3.49597300 | -1.98443000 | -1.40443400 |
| H | -3.13663800 | -4.01644200 | 1.29986300  |
| H | -3.77129100 | 0.24048600  | 1.19810000  |
| H | -3.65043500 | -2.03640800 | -2.47574200 |
| H | -3.26383800 | -4.12052000 | -1.17182400 |
| H | -3.36033300 | -1.82391500 | 2.45290000  |
| N | -3.89850100 | 0.39188200  | -1.42770000 |
| H | -3.96709900 | 0.37571200  | -2.43201300 |
| H | -3.78266800 | 1.28546700  | -0.96142800 |

|   |             |             |             |
|---|-------------|-------------|-------------|
| F | 3.58800800  | -2.63649200 | -0.33139000 |
| F | 1.88116400  | -2.42884500 | 1.17112200  |
| F | 3.66308800  | -0.99234000 | 1.25996300  |
| F | 3.93828500  | -3.19996500 | 1.88075000  |
| B | 3.29573900  | -2.35983000 | 1.01815400  |
| F | -1.80230700 | -1.47479800 | -1.68284600 |
| F | -0.39453700 | 3.17336300  | 1.20802900  |
| F | -2.10546700 | 2.26387500  | -0.02341700 |
| F | -2.59086300 | 3.60273400  | 1.78267800  |
| F | -1.69138400 | 1.50499300  | 2.09188000  |
| B | -1.70691400 | 2.67214400  | 1.31336700  |
| C | -3.68755800 | -3.04300600 | -0.63799500 |
| C | -3.57774900 | -3.03832100 | 0.72456600  |
| C | -3.53443400 | -1.80746100 | 1.45034200  |
| C | -3.64287200 | -0.60352400 | 0.81988100  |
| C | -3.77574600 | -0.57967800 | -0.59511400 |
| C | -3.69864200 | -1.81691900 | -1.34051100 |
| H | -3.52494900 | -3.97172100 | 1.27109800  |
| H | -3.59702800 | 0.33063600  | 1.36801800  |
| H | -3.92607600 | -1.79750300 | -2.39887900 |
| H | -3.71185600 | -3.96905600 | -1.19628900 |
| H | -3.41845900 | -1.83355300 | 2.52726900  |
| N | -3.87064100 | 0.57277700  | -1.24928700 |
| H | -3.90147900 | 0.57951600  | -2.25815900 |
| H | -3.64748600 | 1.44448500  | -0.77040800 |

**TS1SET NH2**

**Num. Imaginary Frequencies: 1**

|    |             |             |             |
|----|-------------|-------------|-------------|
| H  | -0.02589200 | 0.57648900  | -3.01094400 |
| C  | -0.23737200 | 0.72153500  | -1.95154200 |
| C  | 0.72813900  | 1.74310500  | -1.29665000 |
| H  | -1.26664800 | 1.04689800  | -1.81126800 |
| N  | -0.05193400 | -0.54722900 | -1.27055100 |
| H  | 0.20220800  | 2.42821100  | -0.63342600 |
| H  | 1.29681900  | 2.29550400  | -2.04265400 |
| N  | 1.70919500  | 0.96666900  | -0.45532500 |
| C  | 1.21532100  | -1.18456600 | -1.60197600 |
| C  | -0.24529100 | -0.43422900 | 0.16693900  |
| C  | 2.31443400  | -0.12383400 | -1.31686200 |
| C  | 2.75770200  | 1.84033300  | 0.15135700  |
| C  | 0.95992200  | 0.35366700  | 0.72200700  |
| H  | 1.21800300  | -1.46854200 | -2.65371000 |
| H  | 1.35654200  | -2.06094100 | -0.97237500 |
| H  | -0.27265300 | -1.43373500 | 0.60006000  |
| H  | -1.17389700 | 0.09641500  | 0.35370900  |
| H  | 3.15730000  | -0.56219900 | -0.78776500 |
| H  | 2.65496700  | 0.36383300  | -2.22940200 |
| Cl | 3.78757800  | 2.60249400  | -1.07349700 |
| H  | 2.24604600  | 2.62202100  | 0.70999200  |
| H  | 3.37582700  | 1.20342700  | 0.78276300  |
| H  | 1.66539100  | -0.29084000 | 1.23941300  |
| H  | 0.62502100  | 1.17584500  | 1.35339100  |

**M2<sub>NH2</sub>**

**Num. Imaginary Frequencies: 0**

|   |             |             |             |
|---|-------------|-------------|-------------|
| H | -2.24539400 | 2.05630400  | 2.99644500  |
| C | -1.62439500 | 1.92840300  | 2.10816900  |
| C | -2.51931500 | 1.82746300  | 0.84058400  |
| H | -0.96482100 | 2.79063400  | 2.01084700  |
| N | -0.80687600 | 0.73186100  | 2.28033600  |
| H | -2.27731600 | 2.60152400  | 0.11331200  |
| H | -3.58259400 | 1.84945600  | 1.07444900  |
| N | -2.24164200 | 0.50083700  | 0.18403800  |
| C | -1.66005300 | -0.44735600 | 2.39767600  |
| C | 0.06520200  | 0.57953200  | 1.11899100  |
| C | -2.57631400 | -0.60410900 | 1.15722400  |
| C | -2.97796700 | 0.33131300  | -1.10093400 |
| C | -0.76619700 | 0.44069100  | -0.17688100 |
| H | -2.26373300 | -0.35359200 | 3.30182900  |
| H | -1.02852300 | -1.33066800 | 2.48589600  |

|    |             |             |             |    |             |             |             |
|----|-------------|-------------|-------------|----|-------------|-------------|-------------|
| H  | 0.66787700  | -0.32061100 | 1.25696700  | H  | 1.45982900  | -0.48437200 | 0.45306900  |
| H  | 0.71176000  | 1.45673500  | 1.05472100  | H  | 4.73570800  | -1.05320400 | -1.34335900 |
| H  | -2.42688000 | -1.55179400 | 0.64282000  | H  | 3.13994100  | -2.12721800 | -2.92387400 |
| H  | -3.63171300 | -0.48905800 | 1.40025600  | H  | 1.01868700  | -3.09736600 | -2.15067300 |
| Cl | -4.73923400 | 0.40482800  | -0.90203300 | H  | 1.22168400  | 2.38209700  | 0.33084900  |
| H  | -2.68007100 | 1.14282800  | -1.76084900 | C  | 0.40678800  | 1.90198200  | 0.86239400  |
| H  | -2.71156300 | -0.64489500 | -1.50308400 | C  | -0.91523800 | 2.64725700  | 0.54658700  |
| H  | -0.61503000 | -0.51884000 | -0.66441100 | H  | 0.64065500  | 1.92054200  | 1.92627200  |
| H  | -0.58326700 | 1.26445700  | -0.86459900 | N  | 0.28791000  | 0.49173100  | 0.44171500  |
| F  | -2.05450200 | -3.75778800 | 0.18350300  | H  | -1.24219900 | 3.28347800  | 1.37089900  |
| F  | -0.18854500 | -2.47173100 | 0.52456700  | H  | -0.83473300 | 3.25044700  | -0.35635400 |
| F  | -1.30348700 | -2.35086500 | -1.46595100 | N  | -1.99560500 | 1.62615500  | 0.29749400  |
| F  | -0.08664800 | -4.22719400 | -0.94504100 | C  | -0.20603400 | 0.44708400  | -0.94896200 |
| B  | -0.92420300 | -3.24816700 | -0.42349700 | C  | -0.68472500 | -0.18694000 | 1.31977600  |
| F  | 4.70475900  | -0.57950300 | 1.40544400  | C  | -1.67379800 | 0.90751900  | -0.99695700 |
| F  | -0.28396100 | 3.45187100  | -0.26511000 | C  | -3.37404800 | 2.19096900  | 0.25944200  |
| F  | 1.91780200  | 3.47054700  | 0.40007800  | C  | -1.96122900 | 0.64924600  | 1.45466200  |
| F  | 1.26567200  | 4.65094500  | -1.47091800 | H  | 0.45555300  | 1.07258900  | -1.54554500 |
| F  | 1.32555400  | 2.34195400  | -1.47243300 | H  | -0.15548100 | -0.57884800 | -1.31336300 |
| B  | 1.04389800  | 3.54391200  | -0.70632000 | H  | -0.93741700 | -1.14371700 | 0.87610900  |
| C  | 3.53497200  | -2.46655600 | 0.50003400  | H  | -0.23192500 | -0.34866300 | 2.29821800  |
| C  | 2.49994300  | -2.85476100 | -0.24768600 | H  | -2.36818400 | 0.07318400  | -1.07289400 |
| C  | 1.89890200  | -1.93012300 | -1.20657200 | H  | -1.84966800 | 1.61987100  | -1.80188100 |
| C  | 2.24580000  | -0.62253300 | -1.29332600 | Cl | -3.53403000 | 3.52693200  | -0.88812100 |
| C  | 3.22847200  | -0.12770400 | -0.37547600 | H  | -3.60937800 | 2.56677000  | 1.25309100  |
| C  | 4.14639700  | -1.12305800 | 0.27039700  | H  | -4.04293000 | 1.38191600  | -0.03231800 |
| H  | 2.05175600  | -3.83534000 | -0.15683400 | H  | -2.84840100 | 0.01920400  | 1.40281000  |
| H  | 1.71975500  | 0.08404000  | -1.92416200 | H  | -1.97492300 | 1.25933400  | 2.35960600  |
| H  | 4.96246500  | -1.25884500 | -0.46094400 | B  | -3.08668600 | -2.34503800 | -0.13862200 |
| H  | 4.03136200  | -3.11006200 | 1.21605500  | F  | -3.81535600 | -1.12315700 | -0.12116000 |
| H  | 1.09546700  | -2.31219600 | -1.82817900 | F  | -1.96797100 | -2.15552200 | -1.01472400 |
| N  | 3.37888000  | 1.12756200  | -0.10615900 | F  | -3.85828600 | -3.38945700 | -0.55645400 |
| H  | 4.02258700  | 1.42673100  | 0.61788500  | F  | -2.55352100 | -2.55747300 | 1.15213400  |
| H  | 2.76138800  | 1.82923400  | -0.53275900 | B  | 3.48844100  | 1.77736500  | -0.07191900 |

**TS<sub>2NH2</sub>**

**Num. Imaginary Frequencies: 1**

|   |            |             |             |   |             |             |             |
|---|------------|-------------|-------------|---|-------------|-------------|-------------|
| C | 1.31331100 | -2.49299400 | -0.09850800 | F | 1.86426800  | -1.74500400 | 2.07192300  |
| C | 2.10175800 | -1.60318900 | 0.72413000  | H | 4.09064100  | -0.79104400 | 1.04008000  |
| C | 3.44488500 | -1.27747200 | 0.32141500  | N | 0.28301000  | -3.15554100 | 0.41750900  |
| C | 3.78802000 | -1.42980700 | -0.98526800 | H | -0.47646200 | -3.46453500 | -0.17761000 |
| C | 2.86757400 | -2.03616700 | -1.87809100 | H | 0.07583800  | -3.08353000 | 1.40308800  |
| C | 1.66353300 | -2.55485900 | -1.46931600 |   |             |             |             |

**M2<sub>NH2</sub>****Num. Imaginary Frequencies: 0**

|    |             |             |             |
|----|-------------|-------------|-------------|
| H  | -2.24539400 | 2.05630400  | 2.99644500  |
| C  | -1.62439500 | 1.92840300  | 2.10816900  |
| C  | -2.51931500 | 1.82746300  | 0.84058400  |
| H  | -0.96482100 | 2.79063400  | 2.01084700  |
| N  | -0.80687600 | 0.73186100  | 2.28033600  |
| H  | -2.27731600 | 2.60152400  | 0.11331200  |
| H  | -3.58259400 | 1.84945600  | 1.07444900  |
| N  | -2.24164200 | 0.50083700  | 0.18403800  |
| C  | -1.66005300 | -0.44735600 | 2.39767600  |
| C  | 0.06520200  | 0.57953200  | 1.11899100  |
| C  | -2.57631400 | -0.60410900 | 1.15722400  |
| C  | -2.97796700 | 0.33131300  | -1.10093400 |
| C  | -0.76619700 | 0.44069100  | -0.17688100 |
| H  | -2.26373300 | -0.35359200 | 3.30182900  |
| H  | -1.02852300 | -1.33066800 | 2.48589600  |
| H  | 0.66787700  | -0.32061100 | 1.25696700  |
| H  | 0.71176000  | 1.45673500  | 1.05472100  |
| H  | -2.42688000 | -1.55179400 | 0.64282000  |
| H  | -3.63171300 | -0.48905800 | 1.40025600  |
| Cl | -4.73923400 | 0.40482800  | -0.90203300 |
| H  | -2.68007100 | 1.14282800  | -1.76084900 |
| H  | -2.71156300 | -0.64489500 | -1.50308400 |
| H  | -0.61503000 | -0.51884000 | -0.66441100 |
| H  | -0.58326700 | 1.26445700  | -0.86459900 |
| F  | -2.05450200 | -3.75778800 | 0.18350300  |
| F  | -0.18854500 | -2.47173100 | 0.52456700  |
| F  | -1.30348700 | -2.35086500 | -1.46595100 |
| F  | -0.08664800 | -4.22719400 | -0.94504100 |
| B  | -0.92420300 | -3.24816700 | -0.42349700 |
| F  | 4.70475900  | -0.57950300 | 1.40544400  |
| F  | -0.28396100 | 3.45187100  | -0.26511000 |
| F  | 1.91780200  | 3.47054700  | 0.40007800  |
| F  | 1.26567200  | 4.65094500  | -1.47091800 |
| F  | 1.32555400  | 2.34195400  | -1.47243300 |
| B  | 1.04389800  | 3.54391200  | -0.70632000 |
| C  | 3.53497200  | -2.46655600 | 0.50003400  |
| C  | 2.49994300  | -2.85476100 | -0.24768600 |
| C  | 1.89890200  | -1.93012300 | -1.20657200 |
| C  | 2.24580000  | -0.62253300 | -1.29332600 |
| C  | 3.22847200  | -0.12770400 | -0.37547600 |
| C  | 4.14639700  | -1.12305800 | 0.27039700  |

|   |            |             |             |
|---|------------|-------------|-------------|
| H | 2.05175600 | -3.83534000 | -0.15683400 |
| H | 1.71975500 | 0.08404000  | -1.92416200 |
| H | 4.96246500 | -1.25884500 | -0.46094400 |
| H | 4.03136200 | -3.11006200 | 1.21605500  |
| H | 1.09546700 | -2.31219600 | -1.82817900 |
| N | 3.37888000 | 1.12756200  | -0.10615900 |
| H | 4.02258700 | 1.42673100  | 0.61788500  |
| H | 2.76138800 | 1.82923400  | -0.53275900 |

**M3<sub>NH2</sub>****Num. Imaginary Frequencies: 0**

|    |             |             |             |
|----|-------------|-------------|-------------|
| H  | 0.88339700  | -0.30608700 | 2.38469700  |
| C  | 0.80815600  | 0.17599600  | 1.40898200  |
| C  | -0.18019500 | 1.35254100  | 1.39806100  |
| H  | 1.78460900  | 0.52158600  | 1.07898200  |
| N  | 0.32224800  | -0.86233000 | 0.44585700  |
| H  | 0.21525000  | 2.19776800  | 0.83584700  |
| H  | -0.44195700 | 1.65692500  | 2.40997300  |
| N  | -1.44329300 | 0.90691900  | 0.71508900  |
| C  | -0.92805300 | -1.50217900 | 0.96706200  |
| C  | 0.04875300  | -0.25258400 | -0.89743700 |
| C  | -1.89734400 | -0.37829500 | 1.36402500  |
| C  | -2.51073900 | 1.95713900  | 0.75345900  |
| C  | -1.15141500 | 0.68519100  | -0.75970800 |
| H  | -0.66446100 | -2.11415300 | 1.82902000  |
| H  | -1.34620400 | -2.12452800 | 0.17752300  |
| H  | -0.18824200 | -1.06453200 | -1.58371900 |
| H  | 0.94305400  | 0.27882300  | -1.20837600 |
| H  | -2.90731700 | -0.60400100 | 1.03027900  |
| H  | -1.89318100 | -0.19610800 | 2.43769600  |
| Cl | -3.05086200 | 2.29983200  | 2.40264400  |
| H  | -2.08495200 | 2.86332800  | 0.32553800  |
| H  | -3.35205100 | 1.57147000  | 0.17839800  |
| H  | -2.05130600 | 0.25825000  | -1.19445400 |
| H  | -0.91692800 | 1.65725700  | -1.19265500 |
| F  | -3.61138200 | -2.47536900 | 0.17154400  |
| F  | -2.42302200 | -1.83207300 | -1.66656400 |
| F  | -4.00376400 | -0.43138100 | -0.78169400 |
| F  | -4.66385700 | -2.35392000 | -1.88082100 |
| B  | -3.72004400 | -1.80833500 | -1.06715800 |
| F  | 0.38800600  | 3.39669300  | -0.77130300 |
| F  | 2.18650300  | 2.01080800  | -0.43845700 |
| F  | 2.40087600  | 3.85204500  | -1.80709000 |
| F  | 1.12346100  | 2.04223400  | -2.45989300 |



|   |            |             |             |    |             |             |             |
|---|------------|-------------|-------------|----|-------------|-------------|-------------|
| B | 1.54241900 | 2.87038700  | -1.41179800 | H  | -2.10375900 | 2.14392800  | 0.00000500  |
| C | 2.86748000 | -3.08356600 | 0.82798400  | H  | -3.34583500 | 0.00000000  | 0.00000400  |
| C | 2.40552700 | -3.32184500 | -0.46980500 | H  | -2.10375900 | -2.14392800 | 0.00000000  |
| C | 2.58880600 | -2.34078400 | -1.44457400 | H  | 0.38055700  | -2.14037300 | -0.00000300 |
| C | 3.21518900 | -1.13614700 | -1.14033800 | H  | 0.38055800  | 2.14037200  | 0.00000200  |
| C | 3.69073000 | -0.87622400 | 0.15361500  | Cl | 2.24945300  | 0.00000000  | -0.00000300 |
| H | 1.92829900 | -4.26212000 | -0.71265300 |    |             |             |             |
| H | 3.34339800 | -0.37257000 | -1.90037000 |    |             |             |             |
| H | 2.75992300 | -3.81568600 | 1.61949700  |    |             |             |             |
| H | 2.23961000 | -2.51300900 | -2.45580800 |    |             |             |             |
| N | 4.32792000 | 0.29260400  | 0.48564600  |    |             |             |             |
| H | 4.53158100 | 0.44333200  | 1.46126400  |    |             |             |             |
| H | 4.04929300 | 1.12006500  | -0.02799400 |    |             |             |             |
| C | 3.48817500 | -1.88310400 | 1.10817500  |    |             |             |             |
| F | 3.90911800 | -1.62689800 | 2.36628000  |    |             |             |             |
| H | 1.04897300 | -1.57986100 | 0.32598700  |    |             |             |             |

### Ph(NH<sub>2</sub>)F

#### Num. Imaginary Frequencies: 0

|   |             |             |             |
|---|-------------|-------------|-------------|
| C | -1.82071600 | 0.83338400  | 0.00447400  |
| C | -1.95060200 | -0.55090000 | 0.00611500  |
| C | -0.80504100 | -1.34339700 | 0.00210600  |
| C | 0.42904200  | -0.73187500 | -0.00438300 |
| C | 0.59609400  | 0.65265900  | -0.00861900 |
| C | -0.56491000 | 1.42932400  | -0.00451300 |
| H | -2.92871700 | -1.01364100 | 0.01147500  |
| H | -0.47122400 | 2.50978600  | -0.01559600 |
| H | -2.70423100 | 1.46018400  | 0.00799700  |
| H | -0.85242300 | -2.42522000 | 0.00715800  |
| N | 1.87189200  | 1.20007800  | -0.07473100 |
| H | 1.96249700  | 2.12748900  | 0.31056500  |
| H | 2.61656500  | 0.58116700  | 0.20993700  |
| F | 1.55234400  | -1.48616500 | 0.00227800  |

### Chlorobenzene

#### Num. Imaginary Frequencies: 0

|   |             |             |             |
|---|-------------|-------------|-------------|
| C | -1.56582500 | 1.20358200  | 0.00000300  |
| C | -2.26281100 | 0.00000000  | 0.00000300  |
| C | -1.56582600 | -1.20358200 | 0.00000000  |
| C | -0.17501800 | -1.21151500 | -0.00000100 |
| C | 0.50308700  | 0.00000000  | 0.00000000  |
| C | -0.17501800 | 1.21151500  | 0.00000200  |

### TS1SN2 chlorobenzene

#### Num. Imaginary Frequencies: 1

|    |             |             |             |
|----|-------------|-------------|-------------|
| H  | 0.43742900  | 0.00842000  | 2.70196700  |
| C  | 0.44580700  | 0.32096700  | 1.65745900  |
| C  | -0.54039700 | 1.48997700  | 1.39154700  |
| H  | 1.44798800  | 0.62359200  | 1.35783100  |
| N  | 0.02756600  | -0.81232000 | 0.84164400  |
| H  | -0.08800600 | 2.25870000  | 0.76544500  |
| H  | -0.91223200 | 1.91924100  | 2.32036300  |
| N  | -1.71880900 | 0.92699900  | 0.64161600  |
| C  | -1.20639800 | -1.41838000 | 1.32668300  |
| C  | -0.06123700 | -0.47233200 | -0.56877900 |
| C  | -2.24658400 | -0.26250600 | 1.41585900  |
| C  | -2.78397600 | 1.94724400  | 0.39889900  |
| C  | -1.24596500 | 0.50105200  | -0.74097500 |
| H  | -1.04071000 | -1.85642700 | 2.31047200  |
| H  | -1.54297100 | -2.17537100 | 0.62107000  |
| H  | -0.25741300 | -1.38191500 | -1.13458900 |
| H  | 0.87310800  | -0.00397900 | -0.87492900 |
| H  | -3.20075500 | -0.56408400 | 0.99039800  |
| H  | -2.38172800 | 0.07807700  | 2.44141600  |
| Cl | -3.50505000 | 2.53686400  | 1.90539400  |
| H  | -2.31758900 | 2.78469800  | -0.11702900 |
| H  | -3.55770400 | 1.46214200  | -0.19489800 |
| H  | -2.08943600 | 0.01627000  | -1.22542400 |
| H  | -0.93635100 | 1.40211300  | -1.26845900 |
| F  | -3.88512700 | -2.50671100 | 0.33100600  |
| F  | -2.45248500 | -2.13600500 | -1.40578500 |
| F  | -4.10219200 | -0.61673700 | -0.94435600 |
| F  | -4.65512900 | -2.67271800 | -1.84044900 |
| B  | -3.81164600 | -2.02157200 | -0.98947700 |
| F  | 1.62250300  | -1.83509100 | 0.71860200  |
| F  | 0.22359800  | 3.23593100  | -1.11945100 |
| F  | 1.96984600  | 2.04250000  | -0.24526800 |
| F  | 2.36630600  | 3.53556600  | -1.94623400 |
| F  | 1.22666700  | 1.58179400  | -2.35568000 |

|    |            |             |             |    |             |             |             |
|----|------------|-------------|-------------|----|-------------|-------------|-------------|
| B  | 1.46104100 | 2.63715600  | -1.44632400 | F  | -4.62800000 | -2.69851600 | -1.83544700 |
| C  | 3.00781400 | -2.54681700 | -1.13848200 | B  | -3.78420700 | -2.04566000 | -0.98853500 |
| C  | 3.07894400 | -1.47752400 | -1.98808300 | F  | 1.54673400  | -1.87254300 | 0.76399600  |
| C  | 3.50056800 | -0.22240500 | -1.49829400 | F  | 0.12905700  | 3.24405400  | -1.08302300 |
| C  | 3.94243200 | -0.05553300 | -0.18158300 | F  | 1.91856100  | 2.09096100  | -0.24442000 |
| C  | 3.87292500 | -1.12812200 | 0.67257000  | F  | 2.25165800  | 3.63612900  | -1.91617200 |
| C  | 3.25390400 | -2.35953400 | 0.26419900  | F  | 1.17802400  | 1.64861500  | -2.35773500 |
| H  | 2.79792800 | -1.57310600 | -3.02893200 | B  | 1.38787400  | 2.69283500  | -1.43238900 |
| H  | 4.28208100 | 0.91231500  | 0.16157300  | C  | 3.12590300  | -1.48433100 | -2.00209700 |
| H  | 3.35782400 | -3.22269500 | 0.90922200  | C  | 3.08489100  | -2.55791800 | -1.14959200 |
| H  | 2.66036100 | -3.51506900 | -1.47745500 | C  | 3.36759200  | -2.37474800 | 0.23226600  |
| H  | 3.48099400 | 0.64203300  | -2.15316400 | C  | 3.87980000  | -1.11459700 | 0.65969000  |
| Cl | 4.30775700 | -0.96327100 | 2.32364800  | C  | 3.91785600  | -0.03603800 | -0.19291400 |
|    |            |             |             | C  | 3.51131000  | -0.21726500 | -1.51806300 |
|    |            |             |             | H  | 2.84972300  | -1.59347000 | -3.04313700 |
|    |            |             |             | H  | 2.76960100  | -3.53567500 | -1.49141900 |
|    |            |             |             | H  | 3.43461900  | -3.22420600 | 0.89895100  |
|    |            |             |             | H  | 4.21622800  | 0.94255100  | 0.15830300  |
|    |            |             |             | H  | 3.48299000  | 0.64230000  | -2.17798000 |
|    |            |             |             | Cl | 4.29664200  | -0.93199800 | 2.32008100  |

### TS1SET chlorobenzene

#### Num. Imaginary Frequencies: 1

|    |             |             |             |
|----|-------------|-------------|-------------|
| H  | 0.47782800  | -0.01580600 | 2.68045700  |
| C  | 0.47287000  | 0.31682000  | 1.64290500  |
| C  | -0.52917100 | 1.47461600  | 1.39237900  |
| H  | 1.46975000  | 0.62063700  | 1.32852100  |
| N  | 0.03812500  | -0.80076300 | 0.81180800  |
| H  | -0.08704000 | 2.25426500  | 0.77371000  |
| H  | -0.90115300 | 1.88800800  | 2.32807000  |
| N  | -1.70626900 | 0.90788400  | 0.64094700  |
| C  | -1.17777600 | -1.44041400 | 1.29926200  |
| C  | -0.03935900 | -0.46031400 | -0.60090900 |
| C  | -2.22159200 | -0.29083100 | 1.41019800  |
| C  | -2.77819200 | 1.92649400  | 0.41256600  |
| C  | -1.24389700 | 0.49265100  | -0.75009800 |
| H  | -0.98772700 | -1.88790600 | 2.27369500  |
| H  | -1.50613200 | -2.19033100 | 0.58251400  |
| H  | -0.21819800 | -1.37258000 | -1.16772200 |
| H  | 0.89021400  | 0.02413700  | -0.89244800 |
| H  | -3.17712300 | -0.59682100 | 0.99121200  |
| H  | -2.34838200 | 0.03824000  | 2.44037500  |
| Cl | -3.49789000 | 2.49028700  | 1.92829100  |
| H  | -2.31463900 | 2.77156600  | -0.09401800 |
| H  | -3.55006500 | 1.44421000  | -0.18597700 |
| H  | -2.08630800 | -0.00395600 | -1.22383900 |
| H  | -0.95398100 | 1.39858200  | -1.27946500 |
| F  | -3.84106300 | -2.53695100 | 0.33089500  |
| F  | -2.42601000 | -2.14508000 | -1.41482000 |
| F  | -4.08470600 | -0.64279500 | -0.93220000 |

### Mesitylene

#### Num. Imaginary Frequencies: 0

|   |             |             |             |
|---|-------------|-------------|-------------|
| C | 1.27470700  | -0.58721600 | 0.01076300  |
| C | 1.12774800  | 0.80262700  | 0.00732900  |
| C | -0.12865800 | 1.39725800  | -0.00616400 |
| C | -1.25930000 | 0.57522200  | -0.01716200 |
| C | -1.14603200 | -0.81015900 | -0.00841800 |
| C | 0.13134700  | -1.37790200 | 0.00476100  |
| H | 2.01458900  | 1.43035500  | 0.01070800  |
| H | -2.24605700 | 1.02989900  | -0.03262900 |
| H | 0.23121800  | -2.45973400 | 0.00745900  |
| C | -2.36779500 | -1.69242200 | 0.00659700  |
| H | -2.24789400 | -2.53979400 | -0.67226700 |
| H | -2.54385300 | -2.09415700 | 1.00877300  |
| H | -3.25858200 | -1.13804100 | -0.29291000 |
| C | -0.28150400 | 2.89685500  | 0.00525400  |
| H | -0.97501800 | 3.22698300  | -0.77122200 |
| H | -0.67609000 | 3.23797700  | 0.96608900  |
| H | 0.67611700  | 3.39226800  | -0.15928800 |
| C | 2.64970000  | -1.20468100 | -0.00625900 |
| H | 2.60785100  | -2.26923900 | 0.22674500  |
| H | 3.11051000  | -1.09387500 | -0.99155800 |

|   |            |             |            |
|---|------------|-------------|------------|
| H | 3.30592400 | -0.72013400 | 0.71989100 |
|---|------------|-------------|------------|

|   |            |             |            |
|---|------------|-------------|------------|
| C | 4.11796200 | -0.37239500 | 0.97007700 |
|---|------------|-------------|------------|

|   |            |             |            |
|---|------------|-------------|------------|
| C | 3.73409500 | -1.60177200 | 1.44812800 |
|---|------------|-------------|------------|

|   |            |             |            |
|---|------------|-------------|------------|
| C | 3.11462100 | -2.52170900 | 0.54058400 |
|---|------------|-------------|------------|

|   |            |             |             |
|---|------------|-------------|-------------|
| H | 3.40569700 | -0.73890400 | -2.34561600 |
|---|------------|-------------|-------------|

|   |            |            |            |
|---|------------|------------|------------|
| H | 4.53040400 | 0.36846700 | 1.64764700 |
|---|------------|------------|------------|

|   |            |             |            |
|---|------------|-------------|------------|
| H | 2.93609700 | -3.53893500 | 0.87421800 |
|---|------------|-------------|------------|

|   |            |             |            |
|---|------------|-------------|------------|
| C | 3.82379200 | -1.96785600 | 2.89668100 |
|---|------------|-------------|------------|

|   |            |             |            |
|---|------------|-------------|------------|
| H | 2.81829900 | -2.12172900 | 3.30168800 |
|---|------------|-------------|------------|

|   |            |             |            |
|---|------------|-------------|------------|
| H | 4.37122800 | -2.90436800 | 3.02906400 |
|---|------------|-------------|------------|

|   |            |             |            |
|---|------------|-------------|------------|
| H | 4.31805500 | -1.18841700 | 3.47559600 |
|---|------------|-------------|------------|

|   |            |            |             |
|---|------------|------------|-------------|
| C | 4.43108300 | 1.29936700 | -0.87922500 |
|---|------------|------------|-------------|

|   |            |            |             |
|---|------------|------------|-------------|
| H | 4.06142000 | 2.08778900 | -0.22004400 |
|---|------------|------------|-------------|

|   |            |            |             |
|---|------------|------------|-------------|
| H | 5.52645700 | 1.33868500 | -0.86592900 |
|---|------------|------------|-------------|

|   |            |            |             |
|---|------------|------------|-------------|
| H | 4.07604900 | 1.50643600 | -1.88652500 |
|---|------------|------------|-------------|

|   |            |             |             |
|---|------------|-------------|-------------|
| C | 2.49971300 | -3.26340400 | -1.78867000 |
|---|------------|-------------|-------------|

|   |            |             |             |
|---|------------|-------------|-------------|
| H | 2.59836300 | -2.96316800 | -2.83104300 |
|---|------------|-------------|-------------|

|   |            |             |             |
|---|------------|-------------|-------------|
| H | 2.96614200 | -4.24225500 | -1.65446700 |
|---|------------|-------------|-------------|

|   |            |             |             |
|---|------------|-------------|-------------|
| H | 1.43388900 | -3.37900600 | -1.56092600 |
|---|------------|-------------|-------------|

#### TS1SET mesitylene

##### Num. Imaginary Frequencies: 1

|   |            |            |            |
|---|------------|------------|------------|
| H | 0.12507200 | 0.21361200 | 2.86069100 |
|---|------------|------------|------------|

|   |            |            |            |
|---|------------|------------|------------|
| C | 0.20310600 | 0.51101300 | 1.81503300 |
|---|------------|------------|------------|

|   |             |            |            |
|---|-------------|------------|------------|
| C | -0.82918200 | 1.60260600 | 1.43471300 |
|---|-------------|------------|------------|

|   |            |            |            |
|---|------------|------------|------------|
| H | 1.21175300 | 0.84892400 | 1.57960200 |
|---|------------|------------|------------|

|   |             |             |            |
|---|-------------|-------------|------------|
| N | -0.09077100 | -0.65968400 | 0.99506700 |
|---|-------------|-------------|------------|

|   |             |            |            |
|---|-------------|------------|------------|
| H | -0.37573600 | 2.38953200 | 0.83452200 |
|---|-------------|------------|------------|

|   |             |            |            |
|---|-------------|------------|------------|
| H | -1.30929800 | 2.02002400 | 2.31787100 |
|---|-------------|------------|------------|

|   |             |            |            |
|---|-------------|------------|------------|
| N | -1.89953700 | 0.95076800 | 0.59672300 |
|---|-------------|------------|------------|

|   |             |             |            |
|---|-------------|-------------|------------|
| C | -1.32168600 | -1.33774100 | 1.39079000 |
|---|-------------|-------------|------------|

|   |             |             |             |
|---|-------------|-------------|-------------|
| C | -0.05487600 | -0.36432500 | -0.43379600 |
|---|-------------|-------------|-------------|

|   |             |             |            |
|---|-------------|-------------|------------|
| C | -2.42877500 | -0.24822500 | 1.35432100 |
|---|-------------|-------------|------------|

|   |             |            |            |
|---|-------------|------------|------------|
| C | -2.99047600 | 1.90470300 | 0.22839000 |
|---|-------------|------------|------------|

|   |             |            |             |
|---|-------------|------------|-------------|
| C | -1.28790500 | 0.51341000 | -0.72872600 |
|---|-------------|------------|-------------|

|   |             |             |            |
|---|-------------|-------------|------------|
| H | -1.20113200 | -1.73878000 | 2.39610400 |
|---|-------------|-------------|------------|

|   |             |             |            |
|---|-------------|-------------|------------|
| H | -1.53808500 | -2.13309700 | 0.68055300 |
|---|-------------|-------------|------------|

|   |             |             |             |
|---|-------------|-------------|-------------|
| H | -0.13239400 | -1.30377500 | -0.97896800 |
|---|-------------|-------------|-------------|

|   |            |            |             |
|---|------------|------------|-------------|
| H | 0.87584000 | 0.15515200 | -0.65512000 |
|---|------------|------------|-------------|

|   |             |             |            |
|---|-------------|-------------|------------|
| H | -3.31950100 | -0.61626600 | 0.85103200 |
|---|-------------|-------------|------------|

|   |             |            |            |
|---|-------------|------------|------------|
| H | -2.67918000 | 0.10681800 | 2.35272600 |
|---|-------------|------------|------------|

|    |             |            |            |
|----|-------------|------------|------------|
| Cl | -3.87527800 | 2.49010400 | 1.64643700 |
|----|-------------|------------|------------|

|   |             |            |             |
|---|-------------|------------|-------------|
| H | -2.52125300 | 2.75237500 | -0.26866900 |
|---|-------------|------------|-------------|

|   |             |            |             |
|---|-------------|------------|-------------|
| H | -3.67974000 | 1.36285700 | -0.41811900 |
|---|-------------|------------|-------------|

#### TS1SN2 mesitylene

##### Num. Imaginary Frequencies: 1

|   |            |            |            |
|---|------------|------------|------------|
| H | 0.68488000 | 0.19574900 | 2.38113000 |
|---|------------|------------|------------|

|   |            |            |            |
|---|------------|------------|------------|
| C | 0.43548900 | 0.40084900 | 1.33964500 |
|---|------------|------------|------------|

|   |             |            |            |
|---|-------------|------------|------------|
| C | -0.63371100 | 1.51688900 | 1.22467800 |
|---|-------------|------------|------------|

|   |            |            |            |
|---|------------|------------|------------|
| H | 1.33533400 | 0.67611100 | 0.78807700 |
|---|------------|------------|------------|

|   |             |             |            |
|---|-------------|-------------|------------|
| N | -0.10846500 | -0.81778500 | 0.75455500 |
|---|-------------|-------------|------------|

|   |             |            |            |
|---|-------------|------------|------------|
| H | -0.26650300 | 2.37262200 | 0.66370600 |
|---|-------------|------------|------------|

|   |             |            |            |
|---|-------------|------------|------------|
| H | -0.98681500 | 1.83890500 | 2.20224400 |
|---|-------------|------------|------------|

|   |             |            |            |
|---|-------------|------------|------------|
| N | -1.81897500 | 0.94493200 | 0.49295500 |
|---|-------------|------------|------------|

|   |             |             |            |
|---|-------------|-------------|------------|
| C | -1.29971200 | -1.30592700 | 1.43912200 |
|---|-------------|-------------|------------|

|   |             |             |             |
|---|-------------|-------------|-------------|
| C | -0.33014400 | -0.68582800 | -0.67926800 |
|---|-------------|-------------|-------------|

|   |             |             |            |
|---|-------------|-------------|------------|
| C | -2.37654100 | -0.18608400 | 1.32361300 |
|---|-------------|-------------|------------|

|   |             |            |            |
|---|-------------|------------|------------|
| C | -2.85722600 | 1.98475700 | 0.20377700 |
|---|-------------|------------|------------|

|   |             |            |             |
|---|-------------|------------|-------------|
| C | -1.36285100 | 0.44650900 | -0.87418200 |
|---|-------------|------------|-------------|

|   |             |             |            |
|---|-------------|-------------|------------|
| H | -1.05102800 | -1.50883100 | 2.48046800 |
|---|-------------|-------------|------------|

|   |             |             |            |
|---|-------------|-------------|------------|
| H | -1.65524400 | -2.20774600 | 0.94268300 |
|---|-------------|-------------|------------|

|   |             |             |             |
|---|-------------|-------------|-------------|
| H | -0.72708100 | -1.62537100 | -1.05529200 |
|---|-------------|-------------|-------------|

|   |            |             |             |
|---|------------|-------------|-------------|
| H | 0.61612600 | -0.41989800 | -1.14551100 |
|---|------------|-------------|-------------|

|   |             |             |            |
|---|-------------|-------------|------------|
| H | -3.28271600 | -0.55218200 | 0.85103400 |
|---|-------------|-------------|------------|

|   |             |            |            |
|---|-------------|------------|------------|
| H | -2.61654200 | 0.23702900 | 2.29732900 |
|---|-------------|------------|------------|

|    |             |            |            |
|----|-------------|------------|------------|
| Cl | -3.49311400 | 2.73042900 | 1.67940300 |
|----|-------------|------------|------------|

|   |             |            |             |
|---|-------------|------------|-------------|
| H | -2.37608800 | 2.75755400 | -0.39367400 |
|---|-------------|------------|-------------|

|   |             |            |             |
|---|-------------|------------|-------------|
| H | -3.67132500 | 1.48596800 | -0.31952700 |
|---|-------------|------------|-------------|

|   |             |            |             |
|---|-------------|------------|-------------|
| H | -2.25155800 | 0.08266800 | -1.38720900 |
|---|-------------|------------|-------------|

|   |             |            |             |
|---|-------------|------------|-------------|
| H | -0.91091400 | 1.30444800 | -1.37302200 |
|---|-------------|------------|-------------|

|   |             |             |            |
|---|-------------|-------------|------------|
| F | -4.46884600 | -2.21733500 | 0.42187000 |
|---|-------------|-------------|------------|

|   |             |             |             |
|---|-------------|-------------|-------------|
| F | -2.79096400 | -2.16334900 | -1.11849300 |
|---|-------------|-------------|-------------|

|   |             |             |             |
|---|-------------|-------------|-------------|
| F | -4.32491500 | -0.47278500 | -1.05619600 |
|---|-------------|-------------|-------------|

|   |             |             |             |
|---|-------------|-------------|-------------|
| F | -4.95776300 | -2.56336700 | -1.80971300 |
|---|-------------|-------------|-------------|

|   |             |             |             |
|---|-------------|-------------|-------------|
| B | -4.17936900 | -1.89217700 | -0.91253700 |
|---|-------------|-------------|-------------|

|   |            |             |            |
|---|------------|-------------|------------|
| F | 1.38254100 | -1.85965700 | 0.79495000 |
|---|------------|-------------|------------|

|   |            |            |             |
|---|------------|------------|-------------|
| F | 0.17196000 | 3.26443400 | -1.19063100 |
|---|------------|------------|-------------|

|   |            |            |            |
|---|------------|------------|------------|
| F | 1.87905500 | 2.86444600 | 0.28927600 |
|---|------------|------------|------------|

|   |            |            |             |
|---|------------|------------|-------------|
| F | 2.37334500 | 3.54145400 | -1.85554800 |
|---|------------|------------|-------------|

|   |            |            |             |
|---|------------|------------|-------------|
| F | 1.52724800 | 1.44174500 | -1.45989900 |
|---|------------|------------|-------------|

|   |            |            |             |
|---|------------|------------|-------------|
| B | 1.50883200 | 2.81596500 | -1.07649500 |
|---|------------|------------|-------------|

|   |            |             |             |
|---|------------|-------------|-------------|
| C | 3.09654200 | -2.24941900 | -0.86662400 |
|---|------------|-------------|-------------|

|   |            |             |             |
|---|------------|-------------|-------------|
| C | 3.48839100 | -1.00305800 | -1.29711400 |
|---|------------|-------------|-------------|

|   |            |             |             |
|---|------------|-------------|-------------|
| C | 3.98851800 | -0.04228100 | -0.39687600 |
|---|------------|-------------|-------------|

|   |             |             |             |
|---|-------------|-------------|-------------|
| H | -2.05698200 | -0.04529100 | -1.25626700 |
| H | -1.00189200 | 1.41536500  | -1.26622600 |
| F | -3.78480000 | -2.64436900 | 0.22369000  |
| F | -2.23834500 | -2.22298900 | -1.39955200 |
| F | -4.03113100 | -0.82172500 | -1.14052200 |
| F | -4.34958700 | -2.94321200 | -1.99656300 |
| B | -3.63479400 | -2.19962500 | -1.10532300 |
| F | 1.36183200  | -1.65838900 | 1.16531800  |
| F | -0.05776100 | 3.36762400  | -0.98805900 |
| F | 1.69036500  | 2.23853300  | -0.03440100 |
| F | 2.11045000  | 3.79197700  | -1.67660500 |
| F | 1.08939600  | 1.79236900  | -2.19417200 |
| B | 1.22948000  | 2.83177600  | -1.25401500 |
| C | 3.33253700  | -1.14746500 | -1.29376400 |
| C | 3.08608500  | -2.30525100 | -0.59020400 |
| C | 3.29043900  | -2.29543400 | 0.81910600  |
| C | 3.83961100  | -1.15754200 | 1.47517900  |
| C | 4.06341600  | -0.01923200 | 0.73389300  |
| C | 3.82048700  | 0.01054900  | -0.65435500 |
| H | 3.14466800  | -1.11213600 | -2.36204200 |
| H | 3.17858200  | -3.22198700 | 1.37319800  |
| H | 4.43859000  | 0.87816100  | 1.21460300  |
| C | 4.06282000  | -1.20865800 | 2.95633100  |
| H | 3.10876100  | -1.36850800 | 3.46788000  |
| H | 4.71801200  | -2.04124100 | 3.22392700  |
| H | 4.50643900  | -0.28426200 | 3.32510900  |
| C | 4.12970800  | 1.23503500  | -1.45254500 |
| H | 4.09171900  | 2.13434000  | -0.83966800 |
| H | 5.13868600  | 1.13757400  | -1.87066000 |
| H | 3.43018600  | 1.35265700  | -2.28045700 |
| C | 2.50618800  | -3.52673200 | -1.23453000 |
| H | 3.08790100  | -4.41714800 | -0.98457100 |
| H | 1.48814700  | -3.68786900 | -0.86502400 |
| H | 2.46651000  | -3.42576700 | -2.31851400 |

**Anisole**

**Num. Imaginary Frequencies: 0**

|   |             |             |             |
|---|-------------|-------------|-------------|
| C | 1.32267300  | 1.34809100  | -0.00001400 |
| C | 2.27043200  | 0.33626800  | -0.00003200 |
| C | 1.84614000  | -0.99305800 | -0.00003800 |
| C | 0.49650300  | -1.30096500 | 0.00004200  |
| C | -0.45377900 | -0.27622300 | 0.00007200  |
| C | -0.04156600 | 1.05505000  | 0.00004900  |

|   |             |             |             |
|---|-------------|-------------|-------------|
| H | 1.63709600  | 2.38541900  | 0.00002800  |
| H | 3.32681400  | 0.57390200  | -0.00009500 |
| H | 2.57426900  | -1.79575700 | -0.00005300 |
| H | 0.14626100  | -2.32588100 | 0.00007900  |
| H | -0.75946700 | 1.86390200  | 0.00016100  |
| O | -1.75317400 | -0.67440900 | -0.00000800 |
| C | -2.74752100 | 0.32711500  | -0.00005100 |
| H | -3.70163700 | -0.19516400 | -0.00028500 |
| H | -2.67775800 | 0.95548300  | 0.89366900  |
| H | -2.67747700 | 0.95569500  | -0.89360600 |

**TS1SN2 anisole**

**Num. Imaginary Frequencies: 1**

|    |             |             |             |
|----|-------------|-------------|-------------|
| H  | -0.09266100 | 0.63446100  | -2.88069200 |
| C  | -0.26613600 | 0.74949600  | -1.81072000 |
| C  | 0.64641700  | 1.83537000  | -1.18428400 |
| H  | -1.30909300 | 0.98928600  | -1.61672600 |
| N  | 0.05669900  | -0.51898100 | -1.16550000 |
| H  | 0.10286600  | 2.44286000  | -0.46084100 |
| H  | 1.10580100  | 2.46070900  | -1.94810100 |
| N  | 1.74898700  | 1.12801500  | -0.43847700 |
| C  | 1.34877600  | -1.04072500 | -1.60221600 |
| C  | -0.02194800 | -0.44643700 | 0.28597400  |
| C  | 2.37283000  | 0.10615500  | -1.36604300 |
| C  | 2.76859100  | 2.07169100  | 0.11084800  |
| C  | 1.13652700  | 0.44080500  | 0.77470300  |
| H  | 1.30219900  | -1.29928100 | -2.65952500 |
| H  | 1.60858200  | -1.91271000 | -1.00539400 |
| H  | 0.08817300  | -1.45452800 | 0.68832700  |
| H  | -0.98382200 | -0.02237200 | 0.55758500  |
| H  | 3.28324200  | -0.27476500 | -0.90903500 |
| H  | 2.60682300  | 0.63549000  | -2.28867400 |
| Cl | 3.64890500  | 2.92895500  | -1.16445500 |
| H  | 2.23944500  | 2.80216900  | 0.72029600  |
| H  | 3.47501600  | 1.47443100  | 0.68617000  |
| H  | 1.92739300  | -0.14165700 | 1.23918900  |
| H  | 0.76439100  | 1.22466100  | 1.43411600  |
| F  | 3.90834700  | -2.31697700 | -0.53929900 |
| F  | 2.29867000  | -2.26362600 | 1.07733800  |
| F  | 3.97171300  | -0.69970600 | 1.08007800  |
| F  | 4.44986100  | -2.89157500 | 1.63183900  |
| B  | 3.69238100  | -2.08594300 | 0.83316800  |
| F  | -1.43000100 | -1.54361400 | -1.40961400 |

|   |             |             |             |   |             |             |             |
|---|-------------|-------------|-------------|---|-------------|-------------|-------------|
| F | -0.56496400 | 2.98737600  | 1.46392200  | H | 2.27925200  | 2.78307400  | 0.68975100  |
| F | -2.11119400 | 1.91252400  | 0.16316700  | H | 3.48895500  | 1.43061900  | 0.67236500  |
| F | -2.81683600 | 3.12031300  | 1.98512600  | H | 1.91638500  | -0.15837300 | 1.23550300  |
| F | -1.66932100 | 1.14620800  | 2.27233700  | H | 0.78509700  | 1.23455600  | 1.42993500  |
| B | -1.81063400 | 2.32058600  | 1.51214300  | F | 3.83869400  | -2.38406000 | -0.53049300 |
| C | -2.65040600 | -3.33702000 | -0.21362200 | F | 2.23660500  | -2.28342300 | 1.09111400  |
| C | -2.53366800 | -2.99703500 | 1.10547900  | F | 3.94372500  | -0.75688300 | 1.07610300  |
| C | -2.95599000 | -1.71462800 | 1.53349300  | F | 4.37542400  | -2.95472500 | 1.64318300  |
| C | -3.55332100 | -0.80479400 | 0.67887400  | B | 3.63370900  | -2.13896100 | 0.84142800  |
| C | -3.67513000 | -1.14156100 | -0.66995700 | F | -1.37438800 | -1.53611400 | -1.46619200 |
| C | -3.10080800 | -2.36681700 | -1.15485100 | F | -0.45972400 | 3.03445100  | 1.43443700  |
| H | -2.11753400 | -3.69139200 | 1.82393500  | F | -2.06373600 | 2.01092900  | 0.16190700  |
| H | -3.85736800 | 0.16314000  | 1.05222500  | F | -2.69508500 | 3.24833300  | 1.99414400  |
| H | -3.31624400 | -2.64266100 | -2.17910600 | F | -1.61404100 | 1.23347800  | 2.26401300  |
| H | -2.31826600 | -4.30163300 | -0.57665700 | B | -1.72968500 | 2.41176900  | 1.50505500  |
| H | -2.81419600 | -1.42432500 | 2.56881100  | C | -2.58965100 | -2.96546900 | 1.16066200  |
| O | -4.20434800 | -0.36644500 | -1.59931500 | C | -2.75212400 | -3.35281400 | -0.14597200 |
| C | -4.78957200 | 0.88383400  | -1.20429300 | C | -3.23910400 | -2.42903100 | -1.09191300 |
| H | -4.03712100 | 1.53402600  | -0.75710200 | C | -3.70565800 | -1.14965200 | -0.65496500 |
| H | -5.18106300 | 1.31670600  | -2.12041900 | C | -3.53749200 | -0.76116800 | 0.67878700  |
| H | -5.60515600 | 0.70193200  | -0.50119500 | C | -2.96432600 | -1.65940400 | 1.55785500  |

#### TS1SET anisole

##### Num. Imaginary Frequencies: 1

|    |             |             |             |
|----|-------------|-------------|-------------|
| H  | -0.11216100 | 0.62241400  | -2.88215900 |
| C  | -0.27175300 | 0.75677200  | -1.81271500 |
| C  | 0.66828000  | 1.82712800  | -1.20218600 |
| H  | -1.30895600 | 1.00996400  | -1.60620700 |
| N  | 0.04127200  | -0.50716900 | -1.15142400 |
| H  | 0.14088400  | 2.45803600  | -0.48726900 |
| H  | 1.14101600  | 2.42960200  | -1.97600400 |
| N  | 1.75666700  | 1.10461700  | -0.44899400 |
| C  | 1.31689900  | -1.06778300 | -1.58917900 |
| C  | -0.04704600 | -0.42449600 | 0.30069700  |
| C  | 2.35981600  | 0.06251000  | -1.36910900 |
| C  | 2.79490100  | 2.03523300  | 0.08966100  |
| C  | 1.13566000  | 0.43917200  | 0.77304600  |
| H  | 1.25067700  | -1.33726400 | -2.64229200 |
| H  | 1.55603300  | -1.93825100 | -0.98180300 |
| H  | 0.03702700  | -1.43279800 | 0.70693300  |
| H  | -0.99902400 | 0.02764400  | 0.55952500  |
| H  | 3.26502100  | -0.33037700 | -0.91194600 |
| H  | 2.59962800  | 0.57820800  | -2.29783000 |
| Cl | 3.69160700  | 2.85759100  | -1.19647900 |

#### 4-Anisaldehyde

##### Num. Imaginary Frequencies: 0

|   |             |             |             |
|---|-------------|-------------|-------------|
| C | 0.80342700  | 1.41373400  | -0.00001100 |
| C | 1.46996600  | 0.18496600  | -0.00004300 |
| C | 0.72927800  | -0.99485600 | -0.00007400 |
| C | -0.65750900 | -0.96111800 | -0.00005600 |
| C | -1.31373800 | 0.27509000  | -0.00004500 |
| C | -0.57688000 | 1.46490700  | 0.00008300  |
| H | 1.37807200  | 2.33492200  | 0.00012900  |
| H | 1.25929500  | -1.94063700 | 0.00001900  |
| H | -1.21520200 | -1.88746800 | 0.00015000  |

|   |             |             |             |
|---|-------------|-------------|-------------|
| H | -1.11615000 | 2.40361700  | 0.00028400  |
| O | -2.65691200 | 0.41755500  | -0.00001700 |
| C | -3.45224300 | -0.75293200 | 0.00001400  |
| H | -4.48496300 | -0.41313200 | -0.00037100 |
| H | -3.26461300 | -1.35473100 | -0.89404600 |
| H | -3.26517200 | -1.35433200 | 0.89454900  |
| C | 2.94626500  | 0.14506400  | -0.00008500 |
| H | 3.43856800  | 1.13866700  | -0.00047500 |
| O | 3.60425800  | -0.86455900 | 0.00015000  |

|   |            |             |             |
|---|------------|-------------|-------------|
| F | 1.69547000 | -2.28924900 | 0.29440300  |
| F | 2.48929700 | -3.22819200 | 2.22887300  |
| F | 1.57314100 | -1.11773600 | 2.25489900  |
| B | 1.50933300 | -2.41474700 | 1.72062800  |
| C | 2.88013100 | 2.55827900  | -1.13284400 |
| C | 2.84082400 | 2.56106200  | 0.23519900  |
| C | 3.14326600 | 1.37031000  | 0.95290700  |
| C | 3.54345300 | 0.21479500  | 0.31931900  |
| C | 3.58758200 | 0.20097800  | -1.08105800 |
| C | 3.12482500 | 1.34080600  | -1.82993200 |
| H | 3.76429100 | -0.67052200 | 0.89960400  |
| H | 3.30613300 | 1.33708200  | -2.89669100 |
| H | 2.63671700 | 3.45182700  | -1.69823700 |
| H | 3.05635600 | 1.39007400  | 2.03467200  |
| O | 3.94825200 | -0.83192900 | -1.81030800 |
| C | 4.44952900 | -2.01093300 | -1.15425300 |
| H | 3.67917600 | -2.44639300 | -0.51845700 |
| H | 4.71724900 | -2.68880700 | -1.95927900 |
| H | 5.33644300 | -1.75332200 | -0.57234000 |
| C | 2.49546600 | 3.79962800  | 0.98225300  |
| H | 2.22935800 | 4.67075400  | 0.35413100  |
| O | 2.50368900 | 3.86952200  | 2.18050100  |

**TS1SN2 4-anisaldehyde**

**Num. Imaginary Frequencies: 1**

|    |             |             |             |
|----|-------------|-------------|-------------|
| H  | -0.39659500 | -1.43831600 | -2.78239000 |
| C  | -0.14768400 | -1.36945000 | -1.72332700 |
| C  | -1.14212700 | -2.16608600 | -0.84004800 |
| H  | 0.86503400  | -1.72105800 | -1.54518200 |
| N  | -0.24383000 | 0.03417000  | -1.33442400 |
| H  | -0.62891600 | -2.68542800 | -0.03017100 |
| H  | -1.73321200 | -2.86218400 | -1.43304800 |
| N  | -2.08614300 | -1.17192700 | -0.21278900 |
| C  | -1.48047300 | 0.64255800  | -1.81727000 |
| C  | -0.07773900 | 0.24790100  | 0.09708200  |
| C  | -2.62846600 | -0.27433300 | -1.30628300 |
| C  | -3.18676300 | -1.82743400 | 0.55692300  |
| C  | -1.29989200 | -0.36245500 | 0.80970000  |
| H  | -1.47488100 | 0.67197800  | -2.90632200 |
| H  | -1.57989500 | 1.64508000  | -1.40647200 |
| H  | -0.04527500 | 1.32239900  | 0.28176600  |
| H  | 0.84320200  | -0.23101800 | 0.41360900  |
| H  | -3.44792300 | 0.31520500  | -0.90271700 |
| H  | -2.99239100 | -0.93773000 | -2.08950400 |
| Cl | -4.25603400 | -2.78425800 | -0.48071300 |
| H  | -2.72494000 | -2.49152600 | 1.28517300  |
| H  | -3.76604000 | -1.03079300 | 1.02239700  |
| H  | -1.97084200 | 0.40121000  | 1.19426500  |
| H  | -0.97836000 | -1.05539200 | 1.58809500  |
| F  | -3.75632700 | 2.45092200  | -0.95570600 |
| F  | -2.06458300 | 2.48849900  | 0.57477000  |
| F  | -3.93108300 | 1.22252200  | 0.96926100  |
| F  | -4.06807400 | 3.52760600  | 1.06296300  |
| B  | -3.48281300 | 2.47399400  | 0.42657200  |
| F  | 1.36305300  | 0.75975000  | -1.83401200 |
| F  | 0.21110400  | -2.93047400 | 1.91143300  |

**TS1SET 4-anisaldehyde**

**Num. Imaginary Frequencies: 1**

|   |             |             |             |
|---|-------------|-------------|-------------|
| H | -0.35294800 | -1.42447800 | -2.79992100 |
| C | -0.12490400 | -1.37023100 | -1.73582500 |
| C | -1.14313100 | -2.15818700 | -0.87210200 |
| H | 0.88335100  | -1.72356700 | -1.53720100 |
| N | -0.22276500 | 0.02911400  | -1.32965400 |
| H | -0.64642500 | -2.70087700 | -0.06746400 |
| H | -1.74292900 | -2.83234400 | -1.48114400 |
| N | -2.07419900 | -1.15626600 | -0.23607600 |
| C | -1.44171300 | 0.66563500  | -1.82018300 |
| C | -0.04379700 | 0.22927600  | 0.10345900  |
| C | -2.60173600 | -0.24137900 | -1.32280200 |
| C | -3.18559400 | -1.80618500 | 0.52464100  |
| C | -1.28383400 | -0.36461800 | 0.79829300  |
| H | -1.41798300 | 0.70213300  | -2.90833600 |
| H | -1.52379100 | 1.66592900  | -1.40057900 |
| H | 0.01094000  | 1.30107100  | 0.29447200  |
| H | 0.86605500  | -0.27696600 | 0.40935700  |
| H | -3.41412100 | 0.35602700  | -0.91653900 |

|    |             |             |             |
|----|-------------|-------------|-------------|
| H  | -2.97151500 | -0.89194300 | -2.11389600 |
| Cl | -4.26346300 | -2.73681800 | -0.52654000 |
| H  | -2.73289600 | -2.48318000 | 1.24681300  |
| H  | -3.75502500 | -1.00649600 | 0.99713900  |
| H  | -1.94610700 | 0.40874800  | 1.17859100  |
| H  | -0.98153700 | -1.06493900 | 1.57706600  |
| F  | -3.67946900 | 2.49647800  | -0.96299200 |
| F  | -1.99224300 | 2.49886000  | 0.57261600  |
| F  | -3.88059700 | 1.26215200  | 0.95495000  |
| F  | -3.97995400 | 3.56904100  | 1.05987500  |
| B  | -3.41076500 | 2.50960400  | 0.42063000  |
| F  | 1.30728100  | 0.77559000  | -1.89921300 |
| F  | 0.10650100  | -2.97325500 | 1.87177100  |
| F  | 1.66901000  | -2.38390500 | 0.30789200  |
| F  | 2.35602000  | -3.34561900 | 2.27751600  |
| F  | 1.51238400  | -1.20337000 | 2.25848100  |
| B  | 1.43063000  | -2.50092700 | 1.72681600  |
| C  | 2.82452100  | 2.54315300  | 0.31054700  |
| C  | 2.92501400  | 2.60414300  | -1.05772700 |
| C  | 3.24659100  | 1.44142900  | -1.78825200 |
| C  | 3.62231000  | 0.25382000  | -1.08153300 |
| C  | 3.51552400  | 0.19915400  | 0.31693200  |
| C  | 3.10216200  | 1.32651700  | 0.98927200  |
| H  | 3.40953300  | 1.46494700  | -2.85739100 |
| H  | 3.70338100  | -0.71567300 | 0.86189400  |
| H  | 2.70025300  | 3.52266900  | -1.58912600 |
| H  | 2.97538200  | 1.29916900  | 2.06668100  |
| O  | 4.00574400  | -0.75158900 | -1.84318500 |
| C  | 4.43429400  | -1.97304200 | -1.21933100 |
| H  | 3.62045500  | -2.41049000 | -0.64042700 |
| H  | 4.72042600  | -2.62498600 | -2.03942600 |
| H  | 5.29832000  | -1.77469800 | -0.58200000 |
| C  | 2.43270300  | 3.74604700  | 1.09245300  |
| H  | 2.18650200  | 4.64110200  | 0.49054800  |
| O  | 2.38527100  | 3.76465000  | 2.29191400  |

**Phenol**

**Num. Imaginary Frequencies: 0**

|   |             |             |             |
|---|-------------|-------------|-------------|
| C | -1.12752400 | 1.21467100  | -0.00001100 |
| C | -1.84986100 | 0.02758900  | 0.00001300  |
| C | -1.16655700 | -1.18641500 | 0.00001700  |
| C | 0.22072000  | -1.21910200 | -0.00001900 |
| C | 0.93586700  | -0.02391400 | 0.00003000  |

|   |             |             |             |
|---|-------------|-------------|-------------|
| C | 0.26374500  | 1.19517100  | -0.00000600 |
| H | -1.64512400 | 2.16666600  | -0.00004000 |
| H | -2.93221500 | 0.04630400  | -0.00000800 |
| H | -1.71928800 | -2.11853700 | 0.00001600  |
| H | 0.76812800  | -2.15342200 | -0.00006900 |
| H | 0.82572400  | 2.12404200  | -0.00004700 |
| O | 2.29581000  | -0.11048200 | -0.00002600 |
| H | 2.67796000  | 0.77080100  | 0.00021200  |

**TS1SN2 phenol**

**Num. Imaginary Frequencies: 1**

|    |             |             |             |
|----|-------------|-------------|-------------|
| H  | 0.40826600  | 0.10476200  | 2.81829900  |
| C  | 0.49222200  | 0.37407600  | 1.76511100  |
| C  | -0.45694200 | 1.54142800  | 1.38859600  |
| H  | 1.51644900  | 0.64985900  | 1.52034300  |
| N  | 0.11270500  | -0.78895200 | 0.96987900  |
| H  | 0.04720600  | 2.28113900  | 0.76714800  |
| H  | -0.88613800 | 2.01047100  | 2.27221400  |
| N  | -1.58901400 | 0.96336300  | 0.58115000  |
| C  | -1.16261300 | -1.35663600 | 1.39297800  |
| C  | 0.12510600  | -0.50721500 | -0.45724900 |
| C  | -2.18779900 | -0.18711900 | 1.36176000  |
| C  | -2.61762600 | 1.98743800  | 0.22392600  |
| C  | -1.02571100 | 0.47934300  | -0.74801000 |
| H  | -1.07010400 | -1.75403100 | 2.40328200  |
| H  | -1.46056400 | -2.14050300 | 0.69918000  |
| H  | -0.05053600 | -1.43739500 | -0.99567500 |
| H  | 1.08963200  | -0.07364000 | -0.71834300 |
| H  | -3.11389000 | -0.49249700 | 0.88091700  |
| H  | -2.39073800 | 0.19766200  | 2.36002600  |
| Cl | -3.42696800 | 2.65233100  | 1.65352000  |
| H  | -2.10368600 | 2.79532900  | -0.29393900 |
| H  | -3.35875100 | 1.48891600  | -0.39968300 |
| H  | -1.84145600 | -0.00775600 | -1.27599900 |
| H  | -0.66131000 | 1.35653000  | -1.28063600 |
| F  | -3.78790700 | -2.44842800 | 0.25735800  |
| F  | -2.23162600 | -2.16732800 | -1.38670800 |
| F  | -3.88405600 | -0.60830000 | -1.10319300 |
| F  | -4.40739500 | -2.69046300 | -1.95482500 |
| B  | -3.61411100 | -2.01729800 | -1.07271400 |
| F  | 1.65096300  | -1.84633300 | 1.01475900  |
| F  | 0.49942900  | 3.18470100  | -1.11232100 |
| F  | 2.16015000  | 2.00749200  | -0.06687800 |

|   |            |             |             |
|---|------------|-------------|-------------|
| F | 2.70106200 | 3.42768000  | -1.79107500 |
| F | 1.56560200 | 1.47232700  | -2.20701200 |
| B | 1.75147500 | 2.55794300  | -1.32393700 |
| C | 3.14249100 | -2.65750200 | -0.80997300 |
| C | 3.31110100 | -1.56645100 | -1.60854100 |
| C | 3.75852800 | -0.33786300 | -1.04364800 |
| C | 4.10013100 | -0.22910900 | 0.28941600  |
| C | 3.92622700 | -1.33370300 | 1.11510500  |
| C | 3.30911800 | -2.52607200 | 0.60576300  |
| H | 3.10301800 | -1.61273100 | -2.66959600 |
| H | 4.44792700 | 0.70629000  | 0.70741100  |
| H | 3.30267000 | -3.41503100 | 1.22753200  |
| H | 2.78729600 | -3.60050500 | -1.20614800 |
| H | 3.82688000 | 0.53928700  | -1.67748100 |
| O | 4.20084700 | -1.20634200 | 2.41085700  |
| H | 4.02544200 | -2.02498200 | 2.88815800  |

|   |             |             |             |
|---|-------------|-------------|-------------|
| F | -3.94405900 | -2.30171800 | 0.22273400  |
| F | -2.26483300 | -2.18030000 | -1.31701800 |
| F | -3.84220000 | -0.52399800 | -1.21672200 |
| F | -4.42342700 | -2.61233800 | -2.01529500 |
| B | -3.65619300 | -1.94370800 | -1.10844400 |
| F | 1.56232200  | -2.13830800 | 1.34150500  |
| F | 0.62674800  | 3.07883500  | -1.13417100 |
| F | 2.14592000  | 1.87556500  | 0.07446300  |
| F | 2.88403000  | 3.16700900  | -1.67475100 |
| F | 1.66678100  | 1.26399800  | -2.07783500 |
| B | 1.85146900  | 2.38074300  | -1.23084900 |
| C | 3.06872100  | -2.35312400 | -1.08398800 |
| C | 3.39743300  | -1.17615400 | -1.70138300 |
| C | 3.98831000  | -0.10303500 | -0.96284600 |
| C | 4.24648300  | -0.21662300 | 0.38150700  |
| C | 3.86348300  | -1.39055000 | 1.03375200  |
| C | 3.28086400  | -2.48909700 | 0.30383000  |
| H | 3.21288800  | -1.03340700 | -2.75867300 |
| H | 4.64071800  | 0.60831100  | 0.95947800  |
| H | 3.24011000  | -3.46313800 | 0.77423500  |
| H | 2.64132300  | -3.17937800 | -1.63668600 |
| H | 4.18832600  | 0.83348000  | -1.47106500 |
| O | 3.97868800  | -1.46773800 | 2.34862800  |
| H | 3.37313300  | -2.15176500 | 2.67178500  |

#### TS1SET phenol

##### Num. Imaginary Frequencies: 1

|    |             |             |             |
|----|-------------|-------------|-------------|
| H  | 0.24304300  | 0.10819200  | 2.95627900  |
| C  | 0.40091400  | 0.33283200  | 1.90214700  |
| C  | -0.46519100 | 1.53344900  | 1.41989800  |
| H  | 1.45105700  | 0.53137600  | 1.69798800  |
| N  | -0.02762200 | -0.81157200 | 1.11795400  |
| H  | 0.11628100  | 2.22224700  | 0.80926800  |
| H  | -0.92571300 | 2.05438100  | 2.25722300  |
| N  | -1.57256000 | 0.98291500  | 0.55682700  |
| C  | -1.33891700 | -1.31809600 | 1.48148200  |
| C  | 0.13253300  | -0.61639400 | -0.30972500 |
| C  | -2.29187200 | -0.09439200 | 1.34187400  |
| C  | -2.51119900 | 2.05040100  | 0.09042400  |
| C  | -0.96046900 | 0.40274300  | -0.71362600 |
| H  | -1.31946200 | -1.68075700 | 2.50810100  |
| H  | -1.62873200 | -2.11085100 | 0.79485900  |
| H  | -0.03669000 | -1.56391600 | -0.81755100 |
| H  | 1.12815300  | -0.22473400 | -0.49980000 |
| H  | -3.20065600 | -0.36974400 | 0.81269800  |
| H  | -2.53347000 | 0.34122700  | 2.31011900  |
| Cl | -3.37155900 | 2.81618400  | 1.43556400  |
| H  | -1.91404400 | 2.80444400  | -0.42008200 |
| H  | -3.23728300 | 1.56918600  | -0.56389700 |
| H  | -1.76885700 | -0.07483400 | -1.26108600 |
| H  | -0.52633700 | 1.23142400  | -1.27006700 |

#### Naphthaline

##### Num. Imaginary Frequencies: 0

|   |             |             |             |
|---|-------------|-------------|-------------|
| C | -2.42395800 | -0.70787800 | 0.00000100  |
| C | -1.24135200 | -1.39815000 | 0.00000000  |
| C | -0.00000700 | -0.71051600 | -0.00000100 |
| C | 0.00000000  | 0.71051900  | -0.00000100 |
| C | -1.24135300 | 1.39814800  | -0.00000100 |
| C | -2.42395700 | 0.70787900  | 0.00000100  |
| H | 1.23610200  | -2.48294900 | -0.00000400 |
| H | -3.36610200 | -1.24303100 | 0.00000100  |
| H | -1.23611400 | -2.48294400 | 0.00000100  |
| C | 1.24136100  | -1.39815300 | -0.00000100 |
| C | 1.24136100  | 1.39815600  | -0.00000100 |
| H | -1.23611600 | 2.48294500  | 0.00000200  |
| H | -3.36610300 | 1.24302800  | 0.00000200  |
| C | 2.42395300  | 0.70788300  | 0.00000100  |
| C | 2.42395300  | -0.70788700 | 0.00000100  |
| H | 1.23611100  | 2.48295000  | -0.00000400 |



|   |            |             |            |
|---|------------|-------------|------------|
| H | 3.36610800 | 1.24301800  | 0.00000400 |
| H | 3.36610600 | -1.24302400 | 0.00000100 |

|   |            |             |             |
|---|------------|-------------|-------------|
| C | 3.51507500 | -1.59792000 | -0.69266300 |
| C | 3.91452900 | -0.62260900 | -1.63814000 |
| C | 4.20651200 | 0.65697000  | -1.23210900 |
| H | 3.04755500 | -2.03537100 | 2.67217900  |
| H | 4.30655800 | 2.02260800  | 0.42785000  |
| H | 3.71185700 | 0.32368100  | 2.12456700  |
| C | 2.92799700 | -2.22359000 | 1.61184800  |
| C | 3.13354200 | -2.90151700 | -1.08859700 |
| H | 3.94841100 | -0.89163900 | -2.68841700 |
| H | 4.44791100 | 1.42741600  | -1.95262200 |
| C | 2.72561500 | -3.86405100 | -0.17290500 |
| C | 2.66164100 | -3.54526100 | 1.17454900  |
| H | 3.16680200 | -3.14861700 | -2.14551400 |
| H | 2.45260000 | -4.85456300 | -0.51287900 |
| H | 2.33432100 | -4.28152800 | 1.89891800  |

**TS1SN2 naphthaline**

**Num. Imaginary Frequencies: 1**

|    |             |             |             |
|----|-------------|-------------|-------------|
| H  | 0.12461100  | 0.65183900  | 2.68530700  |
| C  | 0.13906000  | 0.69885300  | 1.59637100  |
| C  | -0.85423100 | 1.76688400  | 1.06322300  |
| H  | 1.14536700  | 0.92260800  | 1.24046900  |
| N  | -0.27083800 | -0.60019400 | 1.08044700  |
| H  | -0.37480000 | 2.47975200  | 0.39646200  |
| H  | -1.34372700 | 2.29959300  | 1.87630800  |
| N  | -1.92550200 | 1.04982200  | 0.28505900  |
| C  | -1.56277400 | -1.04332400 | 1.58837300  |
| C  | -0.21852400 | -0.65646900 | -0.37185100 |
| C  | -2.59420300 | 0.05758100  | 1.20839800  |
| C  | -2.91943000 | 1.99509000  | -0.31347000 |
| C  | -1.27424200 | 0.34482300  | -0.89874100 |
| H  | -1.50041400 | -1.16018100 | 2.66985500  |
| H  | -1.83320400 | -1.98604700 | 1.11475800  |
| H  | -0.47061500 | -1.66615100 | -0.68948900 |
| H  | 0.77980800  | -0.36387500 | -0.68851900 |
| H  | -3.45633100 | -0.36640300 | 0.70084500  |
| H  | -2.91576000 | 0.62239000  | 2.08155200  |
| Cl | -3.80622000 | 2.91106400  | 0.91438200  |
| H  | -2.36475200 | 2.69903500  | -0.93116700 |
| H  | -3.62614800 | 1.39409600  | -0.88403700 |
| H  | -2.06937400 | -0.16400000 | -1.43863400 |
| H  | -0.79414400 | 1.12359000  | -1.49137600 |
| F  | -4.23974100 | -2.31354500 | 0.38742100  |
| F  | -2.51109800 | -2.33576900 | -1.09826400 |
| F  | -4.14642700 | -0.74924500 | -1.28519100 |
| F  | -4.62197000 | -2.95026200 | -1.80025000 |
| B  | -3.91654100 | -2.12968900 | -0.96868000 |
| F  | 1.17681500  | -1.67205900 | 1.51034000  |
| F  | 0.57556000  | 3.73058700  | -1.01781000 |
| F  | 1.90126600  | 2.96309500  | 0.69104100  |
| F  | 2.84385000  | 3.38509700  | -1.36324000 |
| F  | 1.40311200  | 1.61181500  | -1.08097900 |
| B  | 1.70527100  | 2.95976400  | -0.71048300 |
| C  | 4.12681000  | 0.99694200  | 0.12948900  |
| C  | 3.77406300  | 0.04991100  | 1.07646500  |
| C  | 3.46316700  | -1.25590000 | 0.68288800  |

**TS1SET naphthaline**

**Num. Imaginary Frequencies: 1**

|    |             |             |             |
|----|-------------|-------------|-------------|
| H  | -0.81657400 | 0.12001900  | -2.26502900 |
| C  | -0.49694700 | 0.27426800  | -1.23482600 |
| C  | 0.48738600  | 1.46583500  | -1.10475500 |
| H  | -1.36461600 | 0.42089300  | -0.59283200 |
| N  | 0.21287300  | -0.92201100 | -0.78991200 |
| H  | 0.07388000  | 2.25878800  | -0.48701600 |
| H  | 0.77179200  | 1.86406200  | -2.07665100 |
| N  | 1.74721300  | 0.96263300  | -0.44925700 |
| C  | 1.40022000  | -1.23106100 | -1.57698800 |
| C  | 0.48529500  | -0.90630200 | 0.63805600  |
| C  | 2.38338400  | -0.04096900 | -1.37961200 |
| C  | 2.68455700  | 2.08247900  | -0.11148400 |
| C  | 1.39635500  | 0.31776600  | 0.88864500  |
| H  | 1.10408800  | -1.34422400 | -2.61881700 |
| H  | 1.84546500  | -2.14934500 | -1.19712500 |
| H  | 0.99748000  | -1.82790700 | 0.90112600  |
| H  | -0.46172100 | -0.79369200 | 1.16326300  |
| H  | 3.32496300  | -0.36767900 | -0.95002200 |
| H  | 2.57015500  | 0.47795400  | -2.31771000 |
| Cl | 3.17824000  | 2.99724300  | -1.54504100 |
| H  | 2.14926100  | 2.75165400  | 0.56055200  |
| H  | 3.56671000  | 1.63432300  | 0.34310300  |
| H  | 2.33729200  | 0.01393300  | 1.34455600  |
| H  | 0.88081700  | 1.08352000  | 1.46728400  |
| F  | 4.82063100  | -1.80933400 | -0.68093400 |

|   |             |             |             |
|---|-------------|-------------|-------------|
| F | 3.11633000  | -2.10978800 | 0.80251900  |
| F | 4.43460900  | -0.25268300 | 0.95226300  |
| F | 5.30154600  | -2.31776600 | 1.52144100  |
| B | 4.46807600  | -1.65803800 | 0.66675100  |
| F | -1.05757100 | -2.19473800 | -0.93769300 |
| F | -0.24779200 | 3.00668100  | 1.52457600  |
| F | -1.98578000 | 2.63860900  | 0.07907300  |
| F | -2.43894600 | 3.03821800  | 2.29652000  |
| F | -1.45220600 | 1.06837200  | 1.65311600  |
| B | -1.55250200 | 2.47597700  | 1.41291900  |
| C | -4.49398200 | 0.27283200  | -2.00111000 |
| C | -4.05150600 | -1.03925500 | -1.95707400 |
| C | -3.60827800 | -1.59034200 | -0.74656800 |
| C | -3.61690900 | -0.79083500 | 0.42652800  |
| C | -4.06586500 | 0.54299900  | 0.35882700  |
| C | -4.49614400 | 1.06587400  | -0.84476600 |
| H | -3.05068200 | -3.52578200 | -1.56043200 |
| H | -4.83459400 | 0.69372100  | -2.93993400 |
| H | -4.03929000 | -1.64711900 | -2.85538200 |
| C | -3.04900000 | -2.90289500 | -0.67384700 |
| C | -3.13470300 | -1.34783400 | 1.64249000  |
| H | -4.02535800 | 1.16552600  | 1.24631400  |
| H | -4.80944200 | 2.10084200  | -0.89620900 |
| C | -2.69384400 | -2.66263100 | 1.71200000  |
| C | -2.66496100 | -3.44679300 | 0.56367300  |
| H | -3.11217300 | -0.71244400 | 2.52131400  |
| H | -2.35262400 | -3.06870300 | 2.65604700  |
| H | -2.29111700 | -4.46247400 | 0.60208500  |
